# Supplementary material for: Comparative Genomics of Legionella pneumophila Isolates from the West Bank and Germany Support Molecular Epidemiology of Legionnaires’ Disease
Source: MDPI journal article supplement (doi:10.3390/microorganisms11020449), 2023-02-10
Supplement: s1 [file s1]

**Comparative genomics of *Legionella pneumophila* isolates from the West Bank and Germany support molecular epidemiology of Legionnaires' disease**  
**Zayed et al.**

**SUPPLEMENTARY MATERIALS**  
**TABLES**

| Table S1: Main features of <i>L. pneumophila</i> isolates and reference strains used in the study. |                         |                       |                 |                          |        |                           |                   |                             |                  |               |                      |                     |                   |         |                                                            |
|----------------------------------------------------------------------------------------------------|-------------------------|-----------------------|-----------------|--------------------------|--------|---------------------------|-------------------|-----------------------------|------------------|---------------|----------------------|---------------------|-------------------|---------|------------------------------------------------------------|
| Strain designation                                                                                 | GenBank/RefSeq Acc. No: | Sg (mAb) <sup>1</sup> | ST <sup>2</sup> | MLV A-8(12) <sup>3</sup> | VAC C× | Site of Isolation         | Year of Isolation | Source of isolation         | Genome Size (bp) | No. of Genes* | Genomic Islands (bp) | Genomic Islands (%) | Coding Sequences* | Contigs | Reason for selection                                       |
| Genome sequences obtained within this study                                                        |                         |                       |                 |                          |        |                           |                   |                             |                  |               |                      |                     |                   |         |                                                            |
| A156_Gt64(74)_Ps                                                                                   | 0JAPXIV                 | 6 Dresden             | ST7 4           | Gt64(74)                 | VAC C2 | Beit Jala, West Bank      | 2013              | Hospital environmental swab | 3,366,323        | 3,049         | 174,331              | 5.2                 | 3008              | 40      | Thunderbay branch                                          |
| A129_Gt64(74)_Ps                                                                                   | 0JAPXIU                 | 6 Dresden             | ST7 4           | Gt64(74)                 | VAC C2 | Beit Jala, West Bank      | 2013              | Hospital environmental swab | 3,527,232        | 3,206         | 293,904              | 8.3                 | 3166              | 56      | Thunderbay branch                                          |
| A15_Gt12(84)_Ps                                                                                    | 0JAPXIT                 | Sg.8                  | ST1358          | Gt12(84)                 | NA     | East Jerusalem, West Bank | 2012              | Hospital environmental swab | 3,495,260        | 3,088         | 180,013              | 5.2                 | 3,053             | 127     | Lorraine branch                                            |
| A139_Gt4(17)_Ps                                                                                    | 0JAPXIS                 | Sg.1                  | ST1             | Gt4(17)                  | VAC C1 | Nablus, West Bank         | 2013              | Hospital environmental swab | 3,579,958        | 3,242         | 223,851              | 6.3                 | 3,205             | 78      | Worldwide present and highest abundance in our collections |
| A5_Gt4(17)_Ps                                                                                      | 0JAPXIR                 | 1 OLDA                | ST1             | Gt4(17)                  | VAC C1 | East Jerusalem, West Bank | 2012              | Hospital environmental swab | 3,586,669        | 3,249         | 225,997              | 6.3                 | 3,211             | 80      | Worldwide present and highest abundance in our collections |

|                  |          |           |         |           |         |                       |      |                             |           |       |         |     |       |    |                                          |
|------------------|----------|-----------|---------|-----------|---------|-----------------------|------|-----------------------------|-----------|-------|---------|-----|-------|----|------------------------------------------|
| A29_Gt6(18)_Ps   | 0JAPXIQ  | Sg.1      | ST1     | Gt6(18)   | VAC C1  | Hebron, West Bank     | 2012 | Hospital environmental swab | 3,626,550 | 3,289 | 339,005 | 9.3 | 3,251 | 68 | Dominant in southern West Bank           |
| A131_Gt6(18)_Ps  | 0JAPXIP  | Sg.1      | ST1     | Gt6(18)   | VAC C1  | Hebron, West Bank     | 2013 | Hospital environmental swab | 3,548,746 | 3,206 | 281,219 | 7.9 | 3,169 | 67 | Dominant in southern West Bank           |
| A193_Gt40(47)_Ps | 0JAPXIO  | 6 Dresden | ST3 45  | Gt40(47)  | VAC C5  | Hebron, West Bank     | 2014 | Hospital environmental swab | 3,446,379 | 3,098 | 185,152 | 5.4 | 3,056 | 33 | Alcoy branch, close to Warstein outbreak |
| A194_Gt40(47)_Ps | CP114578 | 6 Dresden | ST3 45  | Gt40(47)  | VAC C5  | Hebron, West Bank     | 2014 | Hospital environmental swab | 3,467,904 | 3,121 | 156,728 | 4.5 | 3,071 | 1  | Alcoy branch, close to Warstein outbreak |
| A195_Gt40(47)_Ps | JAPXIN   | 6 Dresden | ST3 45  | Gt40(47)  | VAC C5  | Hebron, West Bank     | 2014 | Hospital environmental swab | 3,440,802 | 3,095 | 167,241 | 4.9 | 3,051 | 42 | Alcoy branch, close to Warstein outbreak |
| A138_Gt9(92)_Ps  | JAPXIM   | 6 Dresden | ST4 61  | Gt9(92)   | VAC C11 | Nablus, West Bank     | 2013 | Hospital environmental swab | 3,363,143 | 3,038 | 162,571 | 4.8 | 2,996 | 40 | Alcoy branch                             |
| A112_Gt10(93)_Ps | JAPXIL   | 6 Dresden | ST4 61  | Gt10(93)  | VAC C11 | Beit Jala, West Bank  | 2013 | Hospital environmental swab | 3,362,286 | 3,030 | 147,968 | 4.4 | 2,990 | 42 | Highly abundant genotype                 |
| A114_Gt10(93)_Ps | JAPXIK   | 6 Dresden | ST4 61  | Gt10(93)  | VAC C11 | Beit Jala, West Bank  | 2013 | Hospital hot water sample   | 3,362,313 | 3,033 | 159,647 | 4.7 | 2,989 | 41 | Highly abundant genotype                 |
| A127_Gt10(93)_Ps | JAPXIJ   | 6 Dresden | ST4 61  | Gt10(93)  | VAC C11 | Beit Jala, West Bank  | 2013 | Hospital environmental swab | 3,363,025 | 3,037 | 142,978 | 4.3 | 2,993 | 38 | Highly abundant genotype                 |
| A108_Gt10(93)_Ps | JAPXII   | 6 Dresden | ST4 61  | Gt10(93)  | VAC C11 | Beit Jala, West Bank  | 2013 | Hospital environmental swab | 3,291,620 | 2,949 | 153,342 | 4.7 | 2,907 | 38 | Highly abundant genotype                 |
| A166_Gt8(142)_Ps | JAPXIH   | Sg.(2-14) | ST1 482 | Gt8(142)  | VAC C5  | Hebron, West Bank     | 2013 | Hospital environmental swab | 3,353,128 | 3,014 | 204,232 | 6.1 | 2,974 | 28 | Alcoy branch                             |
| H34_Gt22(102)_D  | JAPXIG   | Sg.10     | NA      | Gt22(102) | NA      | Braunschweig, Germany | 2013 | Environmental sample        | 3,403,136 | 3,049 | 160,329 | 4.7 | 3,016 | 64 | D7630 branch                             |

|                        |                               |                   |            |           |            |                          |      |                         |               |           |             |     |       |     |                                                                           |
|------------------------|-------------------------------|-------------------|------------|-----------|------------|--------------------------|------|-------------------------|---------------|-----------|-------------|-----|-------|-----|---------------------------------------------------------------------------|
| H29_Gt22(100)_D        | JAPXIF                        | 4<br>Portland     | NA         | Gt22(100) | VAC<br>C2  | Braunschweig,<br>Germany | 2013 | Environmental<br>sample | 3,403,<br>391 | 3,06<br>1 | 144,4<br>15 | 4.2 | 3,017 | 68  | D7630<br>branch                                                           |
| H35_Gt22(102)_D        | JAPXIE                        | Sg.1              | NA         | Gt22(102) | VAC<br>C5  | Braunschweig,<br>Germany | 2013 | Environmental<br>sample | 3,402,<br>267 | 3,04<br>9 | 166,5<br>33 | 4.9 | 3,013 | 64  | D7630<br>branch                                                           |
| H39_Gt4(17)_D          | JAPXID                        | 4<br>Portland     | NA         | Gt4(17)   | NA         | Braunschweig,<br>Germany | 2014 | Environmental<br>sample | 3,592,<br>274 | 3,24<br>5 | 226,2<br>68 | 6.3 | 3,202 | 78  | Worldwide<br>present and<br>highest<br>abundance<br>in our<br>collections |
| H3_Gt14(31)_D          | CP11457<br>6,<br>CP11457<br>7 | 6<br>Chicago      | ST1<br>431 | Gt14(31)  | VAC<br>C2  | Braunschweig,<br>Germany | 2009 | Environmental<br>sample | 3,691,<br>263 | 3,38<br>6 | 209,8<br>67 | 5.7 | 3,336 | 2   | Alcoy<br>branch                                                           |
| H23_Gt14(30)_D         | JAPXIC                        | 6<br>Chicago      | ST1<br>431 | Gt14(30)  | VAC<br>C2  | Braunschweig,<br>Germany | 2013 | Environmental<br>sample | 3,783,<br>853 | 3,48<br>2 | 372,7<br>50 | 9.9 | 3,444 | 130 | Alcoy<br>branch                                                           |
| H1_Gt14(31)_D          | JAPXIB                        | 6<br>Chicago      | ST1<br>431 | Gt14(31)  | VAC<br>C2  | Braunschweig,<br>Germany | 2009 | Environmental<br>sample | 3,654,<br>038 | 3,35<br>5 | 253,0<br>73 | 6.9 | 3,312 | 69  | Alcoy<br>branch                                                           |
| H2_Gt14(31)_D          | JAPXIA                        | 6<br>Chicago      | ST1<br>431 | Gt14(31)  | VAC<br>C2  | Braunschweig,<br>Germany | 2009 | Environmental<br>sample | 3,650,<br>216 | 3,34<br>7 | 238,6<br>49 | 6.5 | 3,310 | 64  | Alcoy<br>branch                                                           |
| L09-313_Cl_Gt84(116)_D | JAPXHZ                        | Sg.3              | ST9<br>3   | Gt84(116) | VAC<br>C13 | Freiburg,<br>Germany     | 2009 | Clinical sample         | 3,398,<br>240 | 3,06<br>8 | 160,1<br>81 | 4.7 | 3,027 | 58  | Thunderbay<br>branch                                                      |
| L01-443_Cl_Gt64(74)_D  | JAPXHY                        | 1<br>Knoxville    | ST9        | Gt64(74)  | VAC<br>C13 | Herford,<br>Germany      | 2001 | Clinical sample         | 3,477,<br>581 | 3,14<br>2 | 225,6<br>39 | 6.5 | 3,099 | 103 | Thunderbay<br>branch                                                      |
| L10-091_Cl_Gt69(69)_D  | JAPXHX                        | 1<br>Philadelphia | ST4<br>35  | Gt69(69)  | VAC<br>C2  | Erlangen,<br>Germany     | 2010 | Clinical sample         | 3,687,<br>459 | 3,37<br>3 | 187,4<br>40 | 5.1 | 3,330 | 97  | Pontiac<br>Branch                                                         |
| L12-317_Cl_Gt72(66)_D  | JAPXHW                        | 1<br>Knoxville    | ST4<br>44  | Gt72(66)  | VAC<br>C2  | Lorrach,<br>Germany      | 2012 | Clinical sample         | 3,516,<br>737 | 3,17<br>0 | 186,7<br>33 | 5.3 | 3,133 | 74  | Pontiac<br>Branch                                                         |
| L11-209_Cl_Gt29(27)_D  | JAPXHV                        | 1<br>Knoxville    | ST6<br>2   | Gt29(27)  | VAC<br>C2  | Hannover,<br>Germany     | 2011 | Clinical sample         | 3,461,<br>996 | 3,13<br>0 | 96,40<br>8  | 2.8 | 3,085 | 65  | Pontiac<br>Branch                                                         |
| L10-023_Cl_Gt75(49)_D  | CP01110<br>5,<br>CP01110<br>6 | 1<br>Knoxville    | ST6<br>2   | Gt75(49)  | VAC<br>C2  | Ulm, Germany             | 2010 | Clinical sample         | 3,641,<br>882 | 3,42<br>7 | NA          | NA  | 3,377 | 1   | Pontiac<br>Branch                                                         |

|                                                 |           |                |        |           |         |                          |          |                 |           |       |         |     |       |    |                                                                                |
|-------------------------------------------------|-----------|----------------|--------|-----------|---------|--------------------------|----------|-----------------|-----------|-------|---------|-----|-------|----|--------------------------------------------------------------------------------|
| L09-329_Cl_Gt75(49)_D                           | JAPXHU    | 1 Philadelphia | ST6_2  | Gt75(49)  | VAC C2  | Trier, Germany           | 2009     | Clinical sample | 3,445,544 | 3,108 | 117,416 | 3.4 | 3,068 | 76 | Pontiac Branch                                                                 |
| L02-521_Cl_Gt29(27)_D                           | JAPXHT    | 1 Philadelphia | ST6_2  | Gt29(27)  | VAC C2  | Bad Langensalza, Germany | 2002     | Clinical sample | 3,478,585 | 3,161 | 118,405 | 3.4 | 3,117 | 72 | Pontiac Branch                                                                 |
| L02-465_Cl_Gt27(133)_D                          | JAPXHS    | 1 Benidorm     | ST4_25 | Gt27(133) | VAC C1  | Berlin, Germany          | 2002     | Clinical sample | 3,500,734 | 3,173 | 214,498 | 6.1 | 3,135 | 52 | Alcoy branch                                                                   |
| L04-545_Cl_Gt40(47)_D                           | JAPXHR    | 6 Dresden      | ST2_92 | Gt40(47)  | VAC C2  | Heide-West, Germany      | 2004     | Clinical sample | 3,358,959 | 3,006 | 160,642 | 4.8 | 2,964 | 34 | Alcoy branch, close to Warstein outbreak                                       |
| L06-153_Cl_Gt71(135)_D                          | JAPXHQ    | 1 OLDA         | ST1_69 | Gt71(135) | VAC C18 | Brandenburg , Germany    | 2006     | Clinical sample | 3,405,980 | 3,074 | NA      | NA  | 3,030 | 39 | Alcoy branch                                                                   |
| L06-129_Cl_Gt71(135)_D                          | JAPXHP    | 1 OLDA         | ST1_69 | Gt71(135) | VAC C18 | Brandenburg , Germany    | 2006     | Clinical sample | 3,406,112 | 3,075 | 172,495 | 5.1 | 3,031 | 40 | Alcoy branch                                                                   |
| L04-041_Cl_Gt30(137)_D                          | JAPXHO    | Sg.3           | ST8_7  | Gt30(137) | NA      | Kassel, Germany          | 2004     | Clinical sample | 3,522,671 | 3,206 | 258,174 | 7.3 | 3,165 | 50 | Alcoy branch                                                                   |
| L05-341_Cl_Gt8(132)_D                           | JAPXHN    | 6 Chicago      | ST8_1  | Gt8(132)  | VAC C16 | Darmstadt, Germany       | 2005     | Clinical sample | 3,410,856 | 3,071 | 219,558 | 6.4 | 3,035 | 31 | Alcoy branch                                                                   |
| <b>Reference genomes used within this study</b> |           |                |        |           |         |                          |          |                 |           |       |         |     |       |    |                                                                                |
| Lpn-LPE509                                      | CP003886  | NA             | NA     | NA        | NA      | Shanghai, China          | 2013     | Hospital water  | 3,434,224 | 3,105 | NA      | NA  | 3,055 | 1  | Already published                                                              |
| Lpn-Philadelphia1                               | NC_002942 | 1 Philadelphia | ST3_6  | Gt64(74)  | VAC C2  | Philadelphia, USA        | 1974     | Clinical sample | 3,397,754 | 2,943 | 180,555 | 5.3 | 3,023 | 1  | Type strain-well characterized/ cause Philadelphia outbreak/ Already published |
| Lpn-Thunderbay                                  | CP003730  | Sg.6           | ST1_87 | NA        | NA      | Thunderbay, Canada       | Unkn own | Clinical sample | 3,455,167 | 2,998 | NA      | NA  | 3,116 | 1  | Already published                                                              |

|                |                             |                |       |         |       |                 |      |                      |           |       |         |     |       |   |                                                              |
|----------------|-----------------------------|----------------|-------|---------|-------|-----------------|------|----------------------|-----------|-------|---------|-----|-------|---|--------------------------------------------------------------|
| Lpn-ATCC43290  | CP003192                    | Sg.12          | ST187 | NA      | NA    | USA             | 1987 | Clinical sample      | 3,359,001 | 2,926 | NA      | NA  | 2,993 | 1 | Already published                                            |
| Lpn-lpm7613    | NZ_LT598657,<br>NZ_LT598658 | NA             | NA    | NA      | NA    | NA              | 2000 | Clinical sample      | 3,261,562 | 2,944 | NA      | NA  | 2,894 | 1 | Already published                                            |
| Lpn-Lens       | CR628337,<br>CR628339       | Sg.1           | ST15  | NA      | NA    | France          | 2004 | Clinical sample      | 3,345,687 | 3,004 | 180,986 | 5.4 | 2,956 | 1 | Caused a large outbreak in France/ already published         |
| Lpn-Lorraine   | FQ958210                    | Sg.1           | ST47  | NA      | NA    | France          | 2004 | Clinical sample      | 3,467,254 | 3,069 | NA      | NA  | 3,130 | 1 | In top six strains that cause disease/ already published     |
| Lpn-HL06041035 | FQ958211                    | NA             | NA    | NA      | NA    | France          | 2006 | Hospital water       | 3,492,535 | 3,184 | NA      | NA  | 3,113 | 1 | Already published                                            |
| Lpn-D7631      | CP015343                    | Sg.1           | ST731 | NA      | NA    | NYC, USA        | 2012 | Environmental sample | 3,436,178 | 3,090 | NA      | NA  | 3,040 | 1 | Already published                                            |
| Lpn-D7630      | CP015344                    | Sg.1           | ST731 | NA      | NA    | NYC, USA        | 2012 | Clinical sample      | 3,444,702 | 3,097 | NA      | NA  | 3,047 | 1 | Already published                                            |
| Lpn-D7632      | CP015342                    | Sg.1           | ST731 | NA      | NA    | NYC, USA        | 2012 | Clinical sample      | 3,435,648 | 3,087 | NA      | NA  | 3,037 | 1 | Already published                                            |
| Lpn-Paris      | CIP107629                   | 1 Philadelphia | ST1   | Gt4(17) | VACC1 | Paris, France   | 2004 | Clinical sample      | 3,503,610 | 3,224 | 163,637 | 4.7 | 3,101 | 1 | Worldwide distributed/ already published/ manually annotated |
| Lpn-OLDA       | CP016030                    | 1 OLDA         | ST1   | NA      | NA    | USA             | 1947 | Frozen cell culture  | 3,486,108 | 3,144 | NA      | NA  | 3,094 | 1 | already published                                            |
| Lpn-Pontiac    | CP016029                    | 1 OLDA         | NA    | NA      | NA    | Michigan, USA   | 1968 | Sporadic LD case     | 3,545,001 | 3,224 | NA      | NA  | 3,174 | 1 | Already published                                            |
| Lpn-Toronto    | CP012019.1                  | NA             | NA    | NA      | NA    | Toronto, Canada | 2005 | Clinical sample      | 3,573,898 | 3,269 | NA      | NA  | 3,187 | 1 | Already published                                            |

**Table S2: The dDDH values among all *L. pneumophila* isolates provided according to TYGS. (Provided in Excel file)**

[illegible]

| Table S3: Whole-genome SNP comparison of <i>L. pneumophila</i> isolates and reference strains. Numbers indicate SNP different from the reference genome |             |                    |                |                |             |          |              |                 |            |            |            |           |           |             |             |           |           |                     |                |
|---------------------------------------------------------------------------------------------------------------------------------------------------------|-------------|--------------------|----------------|----------------|-------------|----------|--------------|-----------------|------------|------------|------------|-----------|-----------|-------------|-------------|-----------|-----------|---------------------|----------------|
| <i>L. pneumophila</i> strain                                                                                                                            | Lpn-LPE 509 | Lpn-Philadelphia 1 | Lpn-Thunderbay | Lpn-ATCC 43290 | Lpn-lpm7613 | Lpn-Lens | Lpn-Lorraine | Lpn-HL060 41035 | Lpn-D763 1 | Lpn-D763 0 | Lpn-D763 2 | Lpn-Paris | Lpn-OLD A | Lpn-Pontiac | Lpn-Toronto | Lpn-Alcoy | Lpn-Corby | A194 - Gt40 (47)-Ps | H3-Gt14 (31)-D |
| Lpn-LPE509                                                                                                                                              | 0           | 7,893              | 6,607          | 4,432          | 5,681       | 61,660   | 52,372       | 55,729          | 51,231     | 51,231     | 51,232     | 54,130    | 54,189    | 54,867      | 57,050      | 56,175    | 56,022    | 56,954              | 56,967         |
| Lpn-Philadelphia 1                                                                                                                                      | 7,949       | 0                  | 7,173          | 6,931          | 8,114       | 60,513   | 52,197       | 57,012          | 54,113     | 54,113     | 54,114     | 56,508    | 56,567    | 57,130      | 58,655      | 59,954    | 59,707    | 59,815              | 59,716         |
| L09-313_C1_Gt84(116)_D                                                                                                                                  | 7,497       | 6,725              | <u>3,463</u>   | 3,736          | 4,614       | 60,800   | 52,184       | 58,590          | 52,244     | 52,244     | 52,245     | 59,151    | 59,210    | 57,112      | 58,850      | 56,022    | 56,099    | 56,924              | 57,071         |
| L01-443_C1_Gt64(74)_D                                                                                                                                   | 9,711       | 8,315              | <u>6,283</u>   | 6,589          | 7,259       | 60,203   | 52,162       | 58,289          | 52,019     | 52,019     | 52,020     | 59,314    | 59,373    | 57,215      | 59,036      | 56,337    | 56,576    | 57,346              | 57,053         |
| Lpn-Thunderbay                                                                                                                                          | 6,645       | 7,122              | 0              | 2,376          | 3,271       | 60,903   | 52,499       | 57,766          | 50,688     | 50,688     | 50,689     | 58,421    | 58,480    | 57,208      | 58,841      | 56,525    | 56,277    | 57,458              | 57,151         |
| Lpn-ATCC43290                                                                                                                                           | 4,471       | 6,876              | 2,376          | 0              | 1,663       | 61,037   | 52,710       | 57,620          | 50,680     | 50,680     | 50,681     | 58,102    | 58,161    | 56,886      | 58,502      | 56,719    | 56,690    | 57,633              | 57,324         |
| Lpn-lpm7613                                                                                                                                             | 5,727       | 8,062              | 3,270          | 1,665          | 0           | 60,217   | 52,715       | 57,852          | 51,426     | 51,426     | 51,427     | 58,455    | 58,518    | 57,005      | 58,682      | 56,692    | 56,664    | 57,919              | 57,438         |
| A156_Gt64(74)_Ps                                                                                                                                        | 6,255       | 5,700              | <u>3,018</u>   | 3,288          | 4,185       | 61,079   | 52,328       | 58,651          | 50,720     | 50,720     | 50,721     | 59,348    | 59,407    | 57,387      | 58,767      | 55,986    | 55,492    | 57,772              | 56,644         |
| A129_Gt64(74)_Ps                                                                                                                                        | 6,251       | 5,700              | <u>3,018</u>   | 3,288          | 4,185       | 61,078   | 52,328       | 58,651          | 50,720     | 50,720     | 50,721     | 59,348    | 59,407    | 57,387      | 58,767      | 55,986    | 55,492    | 57,772              | 56,644         |
| Lpn-Lens                                                                                                                                                | 62,174      | 60,985             | 61,462         | 61,608         | 60,755      | 0        | 55,607       | 68,139          | 66,603     | 66,603     | 66,604     | 67,884    | 67,917    | 62,288      | 63,962      | 70,708    | 71,182    | 70,922              | 70,076         |

|                 |            |        |        |        |            |            |                          |        |              |              |            |            |                          |            |            |            |            |            |            |
|-----------------|------------|--------|--------|--------|------------|------------|--------------------------|--------|--------------|--------------|------------|------------|--------------------------|------------|------------|------------|------------|------------|------------|
| Lpn-Lorraine    | 52,25<br>2 | 52,094 | 52,408 | 52,634 | 52,62<br>4 | 54,96<br>8 | 0                        | 50,857 | 52,01<br>9   | 52,01<br>9   | 52,02<br>0 | 46,52<br>0 | 46,54<br>7               | 40,56<br>6 | 44,74<br>5 | 53,38<br>0 | 53,84<br>8 | 53,59<br>6 | 53,23<br>6 |
| A15_Gt12(84)_Ps | 53,54<br>4 | 52,817 | 52,966 | 53,275 | 53,20<br>8 | 52,50<br>6 | <u>13,18</u><br><u>0</u> | 53,553 | 54,04<br>3   | 54,04<br>3   | 54,04<br>4 | 50,89<br>5 | 50,92<br>2               | 48,03<br>5 | 49,23<br>6 | 55,93<br>1 | 56,52<br>7 | 56,18<br>3 | 55,60<br>5 |
| Lpn-HL06041035  | 55,33<br>4 | 56,644 | 57,431 | 57,284 | 57,50<br>2 | 66,96<br>6 | 50,33<br>0               | 0      | 28,89<br>8   | 28,89<br>8   | 28,89<br>9 | 32,90<br>7 | 32,96<br>8               | 39,43<br>5 | 40,85<br>5 | 47,89<br>8 | 48,86<br>6 | 48,57<br>8 | 45,74<br>6 |
| Lpn-D7631       | 50,81<br>7 | 53,705 | 50,323 | 50,325 | 51,07<br>0 | 65,51<br>4 | 51,65<br>5               | 29,003 | 0            | 0            | 1          | 43,82<br>2 | 43,88<br>7               | 46,21<br>4 | 46,96<br>6 | 45,67<br>3 | 46,29<br>9 | 46,04<br>4 | 44,30<br>5 |
| Lpn-D7630       | 50,81<br>7 | 53,705 | 50,323 | 50,325 | 51,07<br>0 | 65,51<br>4 | 51,65<br>5               | 29,003 | 0            | 0            | 1          | 43,82<br>2 | 43,88<br>7               | 46,21<br>4 | 46,96<br>6 | 45,67<br>3 | 46,29<br>9 | 46,04<br>4 | 44,30<br>5 |
| Lpn-D7632       | 50,81<br>8 | 53,706 | 50,324 | 50,326 | 51,07<br>1 | 65,51<br>5 | 51,65<br>6               | 29,004 | 1            | 1            | 0          | 43,82<br>3 | 43,88<br>8               | 46,21<br>5 | 46,96<br>7 | 45,67<br>4 | 46,30<br>0 | 46,04<br>5 | 44,30<br>6 |
| H34_Gt22(102)_D | 53,85<br>6 | 58,095 | 54,717 | 54,848 | 54,85<br>0 | 66,80<br>7 | 51,79<br>5               | 25,429 | <u>9,793</u> | <u>9,793</u> | 9,794      | 43,03<br>4 | 43,09<br>5               | 44,85<br>2 | 45,63<br>1 | 43,27<br>2 | 43,76<br>1 | 44,29<br>1 | 41,67<br>0 |
| H29_Gt22(100)_D | 53,85<br>5 | 58,066 | 54,688 | 54,819 | 54,82<br>1 | 66,77<br>8 | 51,76<br>6               | 25,400 | <u>9,764</u> | <u>9,764</u> | 9,765      | 43,00<br>5 | 43,06<br>6               | 44,82<br>3 | 45,60<br>2 | 43,24<br>3 | 43,73<br>2 | 44,26<br>2 | 41,64<br>1 |
| H35_Gt22(102)_D | 53,85<br>5 | 58,132 | 54,750 | 54,885 | 54,88<br>7 | 66,84<br>4 | 51,83<br>2               | 25,466 | <u>9,831</u> | <u>9,831</u> | 9,832      | 43,07<br>1 | 43,13<br>2               | 44,88<br>9 | 45,66<br>9 | 43,31<br>0 | 43,79<br>9 | 44,32<br>9 | 41,70<br>8 |
| H39_Gt4(17)_D   | 55,36<br>6 | 57,545 | 57,882 | 57,756 | 57,89<br>3 | 62,81<br>5 | 47,91<br>1               | 36,501 | 44,70<br>9   | 44,70<br>9   | 44,71<br>0 | 11,08<br>4 | <u>11,02</u><br><u>0</u> | 32,76<br>0 | 32,36<br>5 | 46,51<br>0 | 46,59<br>5 | 46,61<br>9 | 46,25<br>8 |
| A139_Gt4(17)_Ps | 53,87<br>6 | 56,316 | 58,267 | 57,951 | 58,29<br>4 | 66,87<br>0 | 46,17<br>2               | 33,110 | 43,89<br>3   | 43,89<br>3   | 43,89<br>4 | 260        | <u>195</u>               | 28,09<br>8 | 29,49<br>8 | 46,34<br>4 | 46,95<br>8 | 46,57<br>4 | 46,18<br>5 |
| Lpn-Paris       | 53,75<br>4 | 56,173 | 58,128 | 57,812 | 58,15<br>5 | 66,76<br>7 | 46,06<br>8               | 32,935 | 43,74<br>4   | 43,74<br>4   | 43,74<br>5 | 0          | 90                       | 28,05<br>7 | 29,45<br>7 | 46,18<br>8 | 46,80<br>2 | 46,41<br>7 | 46,03<br>3 |
| A5_Gt4(17)_Ps   | 53,88<br>1 | 56,289 | 58,244 | 57,928 | 58,27<br>1 | 66,85<br>1 | 46,14<br>7               | 33,054 | 43,86<br>3   | 43,86<br>3   | 43,86<br>4 | 147        | <u>76</u>                | 28,08<br>0 | 29,48<br>0 | 46,30<br>5 | 46,91<br>9 | 46,53<br>4 | 46,15<br>0 |
| Lpn-OLDA        | 53,81<br>7 | 56,232 | 58,187 | 57,871 | 58,21<br>4 | 66,79<br>4 | 46,09<br>2               | 32,997 | 43,80<br>7   | 43,80<br>7   | 43,80<br>8 | 89         | 0                        | 28,02<br>6 | 29,42<br>4 | 46,24<br>7 | 46,86<br>1 | 46,47<br>6 | 46,09<br>2 |
| A29_Gt6(18)_Ps  | 53,00<br>3 | 56,351 | 57,396 | 57,080 | 57,41<br>1 | 66,65<br>3 | 46,11<br>4               | 32,784 | 42,71<br>1   | 42,71<br>1   | 42,71<br>2 | 1,753      | <u>1,688</u>             | 28,11<br>4 | 29,41<br>6 | 45,06<br>5 | 45,63<br>6 | 45,37<br>9 | 44,98<br>2 |
| A131_Gt6(18)_Ps | 53,00<br>1 | 56,347 | 57,392 | 57,076 | 57,40<br>7 | 66,65<br>1 | 46,11<br>2               | 32,782 | 42,70<br>9   | 42,70<br>9   | 42,71<br>0 | 1,751      | <u>1,686</u>             | 28,11<br>2 | 29,41<br>4 | 45,06<br>1 | 45,63<br>2 | 45,37<br>5 | 44,97<br>8 |



|                            |            |        |        |        |            |            |            |        |            |            |            |            |            |                   |            |            |            |                   |            |
|----------------------------|------------|--------|--------|--------|------------|------------|------------|--------|------------|------------|------------|------------|------------|-------------------|------------|------------|------------|-------------------|------------|
| L10-091_Cl_Gt6<br>9(69)_D  | 54,31<br>3 | 56,966 | 57,043 | 56,697 | 56,89<br>2 | 64,69<br>0 | 42,65<br>4 | 38,454 | 44,54<br>1 | 44,54<br>1 | 44,54<br>2 | 24,40<br>7 | 24,37<br>7 | <u>14,35</u><br>8 | 15,65<br>7 | 45,82<br>5 | 45,79<br>6 | 46,44<br>8        | 46,07<br>7 |
| L12-317_Cl_Gt7<br>2(66)_D  | 54,27<br>9 | 56,915 | 56,951 | 56,621 | 56,80<br>1 | 64,19<br>1 | 42,01<br>8 | 38,499 | 44,95<br>4 | 44,95<br>4 | 44,95<br>5 | 25,42<br>2 | 25,39<br>2 | <u>14,94</u><br>2 | 16,58<br>7 | 45,26<br>4 | 45,25<br>7 | 46,00<br>4        | 45,58<br>9 |
| L11-209_Cl_Gt2<br>9(27)_D  | 54,68<br>8 | 56,911 | 56,569 | 56,259 | 56,28<br>0 | 60,11<br>2 | 40,76<br>2 | 40,236 | 46,18<br>6 | 46,18<br>6 | 46,18<br>7 | 28,69<br>6 | 28,66<br>7 | <u>2,704</u>      | 17,49<br>8 | 47,31<br>1 | 47,98<br>1 | 47,91<br>2        | 47,05<br>0 |
| L10-023_Cl_Gt7<br>5(49)_D  | 54,48<br>3 | 56,779 | 56,797 | 56,483 | 56,58<br>6 | 61,11<br>7 | 40,20<br>7 | 39,537 | 46,01<br>3 | 46,01<br>3 | 46,01<br>4 | 27,89<br>8 | 27,86<br>9 | <u>823</u>        | 16,39<br>3 | 46,77<br>4 | 47,33<br>9 | 47,53<br>9        | 46,45<br>3 |
| L09-329_Cl_Gt7<br>5(49)_D  | 54,32<br>7 | 56,492 | 56,579 | 56,342 | 56,44<br>5 | 59,97<br>5 | 40,31<br>6 | 40,251 | 46,76<br>1 | 46,76<br>1 | 46,76<br>2 | 29,24<br>8 | 29,21<br>9 | <u>2,329</u>      | 17,79<br>7 | 47,54<br>5 | 47,96<br>5 | 48,20<br>1        | 47,33<br>3 |
| Lpn-Pontiac                | 54,35<br>0 | 56,657 | 56,744 | 56,430 | 56,53<br>3 | 61,01<br>6 | 39,95<br>1 | 39,432 | 45,99<br>9 | 45,99<br>9 | 46,00<br>0 | 27,95<br>6 | 27,92<br>7 | 0                 | 16,48<br>4 | 46,97<br>3 | 47,50<br>1 | 47,59<br>7        | 46,74<br>7 |
| L02-521_Cl_Gt2<br>9(27)_D  | 54,21<br>5 | 56,521 | 56,608 | 56,294 | 56,39<br>7 | 60,05<br>1 | 40,08<br>3 | 40,073 | 46,57<br>2 | 46,57<br>2 | 46,57<br>3 | 29,08<br>2 | 29,05<br>3 | <u>2,030</u>      | 17,67<br>0 | 47,78<br>7 | 48,27<br>3 | 48,36<br>3        | 47,59<br>5 |
| Lpn-Toronto                | 56,62<br>6 | 58,242 | 58,470 | 58,127 | 58,29<br>4 | 62,88<br>5 | 44,29<br>6 | 40,967 | 46,90<br>0 | 46,90<br>0 | 46,90<br>1 | 29,47<br>7 | 29,44<br>6 | 16,65<br>3        | 0          | 46,57<br>6 | 47,00<br>1 | 47,17<br>6        | 46,85<br>3 |
| L02-465_Cl_Gt2<br>7(133)_D | 56,94<br>7 | 59,635 | 57,486 | 57,654 | 57,71<br>8 | 67,88<br>1 | 51,84<br>4 | 43,966 | 39,93<br>9 | 39,93<br>8 | 39,93<br>9 | 43,40<br>5 | 43,46<br>6 | 45,84<br>6        | 46,26<br>7 | 19,76<br>4 | 20,12<br>2 | <u>19,03</u><br>1 | 21,14<br>6 |
| L04-545_Cl_Gt4<br>0(47)_D  | 56,22<br>6 | 59,148 | 56,602 | 56,796 | 57,08<br>8 | 69,34<br>2 | 52,78<br>1 | 48,072 | 46,33<br>7 | 46,33<br>6 | 46,33<br>7 | 45,80<br>8 | 45,86<br>9 | 47,91<br>8        | 46,70<br>0 | 11,77<br>6 | 12,44<br>8 | <u>2,822</u>      | 15,11<br>2 |
| A193_Gt40(47)_Ps           | 56,79<br>0 | 59,399 | 57,082 | 57,269 | 57,54<br>2 | 69,60<br>1 | 53,18<br>2 | 48,816 | 46,12<br>7 | 46,12<br>6 | 46,12<br>7 | 46,65<br>6 | 46,71<br>7 | 48,22<br>0        | 47,51<br>9 | 13,00<br>8 | 14,26<br>9 | <u>76</u>         | 16,88<br>3 |
| A194_Gt40(47)_Ps           | 55,98<br>0 | 58,832 | 56,516 | 56,703 | 56,97<br>6 | 69,03<br>8 | 52,61<br>3 | 48,246 | 45,54<br>7 | 45,54<br>6 | 45,54<br>7 | 46,08<br>6 | 46,14<br>7 | 47,65<br>1        | 46,95<br>2 | 12,62<br>3 | 13,69<br>6 | 0                 | 16,31<br>9 |

|                        |            |        |        |        |            |            |            |        |            |            |            |            |            |            |            |            |            |                          |            |
|------------------------|------------|--------|--------|--------|------------|------------|------------|--------|------------|------------|------------|------------|------------|------------|------------|------------|------------|--------------------------|------------|
| A195_Gt40(47)_Ps       | 56,04<br>4 | 58,896 | 56,580 | 56,767 | 57,04<br>0 | 69,10<br>1 | 52,67<br>7 | 48,309 | 45,61<br>2 | 45,61<br>1 | 45,61<br>2 | 46,15<br>0 | 46,21<br>1 | 47,71<br>5 | 47,01<br>6 | 12,68<br>6 | 13,75<br>9 | <u>69</u>                | 16,38<br>3 |
| A138_Gt9(2)_Ps         | 55,38<br>7 | 58,320 | 56,257 | 56,577 | 56,77<br>1 | 69,09<br>3 | 52,30<br>4 | 47,447 | 46,59<br>5 | 46,59<br>4 | 46,59<br>5 | 45,20<br>0 | 45,26<br>2 | 47,41<br>4 | 47,23<br>0 | 11,67<br>4 | 12,97<br>7 | <u>9,235</u>             | 15,49<br>7 |
| A112_Gt10(93)_Ps       | 55,39<br>1 | 58,287 | 56,228 | 56,579 | 56,77<br>3 | 69,03<br>5 | 52,11<br>9 | 47,331 | 46,56<br>2 | 46,56<br>1 | 46,56<br>2 | 45,02<br>3 | 45,08<br>5 | 47,00<br>6 | 46,83<br>2 | 12,08<br>0 | 13,38<br>7 | <u>9,737</u>             | 15,66<br>8 |
| A114_Gt10(93)_Ps       | 55,39<br>7 | 58,293 | 56,234 | 56,585 | 56,77<br>9 | 69,04<br>1 | 52,12<br>5 | 47,337 | 46,56<br>8 | 46,56<br>7 | 46,56<br>8 | 45,02<br>9 | 45,09<br>1 | 47,01<br>2 | 46,83<br>8 | 12,08<br>6 | 13,39<br>3 | <u>9,743</u>             | 15,67<br>4 |
| A127_Gt10(93)_Ps       | 55,39<br>8 | 58,324 | 56,265 | 56,616 | 56,81<br>0 | 69,07<br>3 | 52,15<br>7 | 47,369 | 46,60<br>0 | 46,59<br>9 | 46,60<br>0 | 45,06<br>1 | 45,12<br>3 | 47,04<br>4 | 46,87<br>0 | 12,11<br>9 | 13,42<br>6 | <u>9,776</u>             | 15,70<br>7 |
| A108_Gt10(93)_Ps       | 55,40<br>0 | 58,296 | 56,237 | 56,588 | 56,78<br>2 | 69,04<br>4 | 52,12<br>8 | 47,340 | 46,57<br>1 | 46,57<br>0 | 46,57<br>1 | 45,03<br>2 | 45,09<br>4 | 47,01<br>5 | 46,84<br>1 | 12,08<br>9 | 13,39<br>6 | <u>9,746</u>             | 15,67<br>7 |
| H3_Gt14(31)_D          | 55,59<br>9 | 58,312 | 55,793 | 55,969 | 56,07<br>3 | 67,76<br>5 | 51,96<br>0 | 45,184 | 43,50<br>2 | 43,50<br>1 | 43,50<br>2 | 45,49<br>9 | 45,56<br>0 | 46,69<br>4 | 46,41<br>4 | 12,70<br>9 | 13,93<br>2 | 15,99<br>7               | 0          |
| H23_Gt14(30)_D         | 55,60<br>5 | 58,318 | 55,799 | 55,975 | 56,07<br>9 | 67,77<br>1 | 51,96<br>6 | 45,190 | 43,50<br>8 | 43,50<br>7 | 43,50<br>8 | 45,50<br>5 | 45,56<br>6 | 46,70<br>0 | 46,42<br>0 | 12,71<br>5 | 13,93<br>8 | 16,00<br>3               | <u>8</u>   |
| H1_Gt14(31)_D          | 55,60<br>2 | 58,315 | 55,796 | 55,972 | 56,07<br>6 | 67,76<br>8 | 51,96<br>3 | 45,187 | 43,50<br>5 | 43,50<br>4 | 43,50<br>5 | 45,50<br>2 | 45,56<br>3 | 46,69<br>7 | 46,41<br>7 | 12,71<br>2 | 13,93<br>5 | 16,00<br>0               | <u>5</u>   |
| H2_Gt14(31)_D          | 55,60<br>2 | 58,315 | 55,796 | 55,972 | 56,07<br>6 | 67,76<br>8 | 51,96<br>3 | 45,187 | 43,50<br>5 | 43,50<br>4 | 43,50<br>5 | 45,50<br>2 | 45,56<br>3 | 46,69<br>7 | 46,41<br>7 | 12,71<br>2 | 13,93<br>5 | 16,00<br>0               | <u>5</u>   |
| Lpn-Alcoy              | 55,19<br>1 | 58,936 | 55,551 | 55,754 | 55,71<br>5 | 68,79<br>6 | 52,37<br>3 | 47,589 | 45,17<br>3 | 45,17<br>2 | 45,17<br>3 | 45,88<br>9 | 45,95<br>0 | 47,05<br>9 | 46,34<br>9 | 0          | 8,536      | 12,57<br>5               | 12,99<br>2 |
| Lpn-Corby              | 54,76<br>0 | 58,420 | 55,226 | 55,457 | 55,42<br>8 | 69,10<br>5 | 52,66<br>7 | 48,358 | 45,61<br>4 | 45,61<br>3 | 45,61<br>4 | 46,31<br>1 | 46,37<br>2 | 47,41<br>8 | 46,60<br>5 | 8,569      | 0          | 13,66<br>9               | 14,24<br>0 |
| L06-153_Cl_Gt71(135)_D | 56,43<br>5 | 60,030 | 56,786 | 57,052 | 57,08<br>5 | 70,19<br>7 | 53,88<br>3 | 49,343 | 46,57<br>9 | 46,57<br>8 | 46,57<br>9 | 46,68<br>8 | 46,74<br>9 | 48,43<br>6 | 47,56<br>9 | 11,96<br>0 | 12,20<br>3 | <u>11,75</u><br><u>5</u> | 15,63<br>7 |
| L06-129_Cl_Gt71(135)_D | 56,43<br>2 | 60,027 | 56,783 | 57,049 | 57,08<br>2 | 70,19<br>4 | 53,88<br>0 | 49,340 | 46,57<br>6 | 46,57<br>5 | 46,57<br>6 | 46,68<br>5 | 46,74<br>6 | 48,43<br>3 | 47,56<br>6 | 11,95<br>7 | 12,20<br>0 | <u>11,75</u><br><u>2</u> | 15,63<br>4 |
| A166_Gt8(142)_Ps       | 56,73<br>4 | 59,717 | 57,005 | 57,273 | 57,50<br>6 | 69,64<br>8 | 53,33<br>1 | 48,134 | 44,94<br>9 | 44,94<br>8 | 44,95<br>0 | 45,39<br>0 | 45,45<br>1 | 47,60<br>8 | 46,77<br>5 | 13,65<br>0 | 13,57<br>2 | <u>11,52</u><br><u>2</u> | 16,01<br>0 |

|                                                                                                                                                                         |           |           |           |           |           |           |           |           |           |           |           |           |           |           |           |                         |           |                      |           |
|-------------------------------------------------------------------------------------------------------------------------------------------------------------------------|-----------|-----------|-----------|-----------|-----------|-----------|-----------|-----------|-----------|-----------|-----------|-----------|-----------|-----------|-----------|-------------------------|-----------|----------------------|-----------|
| L04-041_CI_Gt30(137)_D                                                                                                                                                  | 55,304    | 58,994    | 55,498    | 55,768    | 55,990    | 68,718    | 52,568    | 45,987    | 42,328    | 42,327    | 42,328    | 45,102    | 45,163    | 46,619    | 46,345    | 14,500                  | 14,015    | <b><u>13,882</u></b> | 15,584    |
| L05-341_CI_Gt8(132)_D                                                                                                                                                   | 56,279    | 59,240    | 56,383    | 56,663    | 56,758    | 69,406    | 52,920    | 47,086    | 45,076    | 45,075    | 45,076    | 45,359    | 45,418    | 47,058    | 46,395    | 13,146                  | 13,809    | <b><u>11,468</u></b> | 14,975    |
| Sum of SNPs                                                                                                                                                             | 2,578,310 | 2,701,132 | 2,617,760 | 2,616,399 | 2,630,850 | 3,523,725 | 2,659,278 | 2,398,444 | 2,314,928 | 2,314,907 | 2,314,961 | 2,175,712 | 2,177,492 | 2,223,081 | 2,313,226 | <b><u>1,930,136</u></b> | 1,983,096 | 1,943,366            | 1,962,137 |
| A color represents relative number of SNPs differences. Each branch has specific color code as given in Figure 1. <b>Bold</b> and <u>Underlined</u> = Least No. of SNPs |           |           |           |           |           |           |           |           |           |           |           |           |           |           |           |                         |           |                      |           |

| <b>Table S4: Genome-wide quantification of SNPs against <i>L. pneumophila</i> strain Alcoy</b> |                 |                  |                  |                   |          |
|------------------------------------------------------------------------------------------------|-----------------|------------------|------------------|-------------------|----------|
| <i>L. pneumophila</i> isolates                                                                 | SNPs count (bp) | SNPs count (Mbp) | Genome size (bp) | Genome size (Mbp) | SNPs/Mbp |
| Lpn-LPE509                                                                                     | 56,175          | 0.056            | 3,434,224        | 3.43              | 0.016    |
| Lpn-Philadelphial                                                                              | 59,954          | 0.060            | 3,397,754        | 3.40              | 0.018    |
| L09-313_Cl_Gt84(116)_D                                                                         | 56,022          | 0.056            | 3,398,240        | 3.40              | 0.016    |
| L01-443_Cl_Gt64(74)_D                                                                          | 56,337          | 0.056            | 3,477,581        | 3.48              | 0.016    |
| Lpn-Thunderbay                                                                                 | 56,525          | 0.057            | 3,455,167        | 3.46              | 0.016    |
| Lpn-ATCC43290                                                                                  | 56,719          | 0.057            | 3,359,001        | 3.36              | 0.017    |
| Lpn-lpm7613                                                                                    | 56,692          | 0.057            | 3,261,562        | 3.26              | 0.017    |
| A156_Gt64(74)_Ps                                                                               | 55,986          | 0.056            | 3,366,323        | 3.37              | 0.017    |
| A129_Gt64(74)_Ps                                                                               | 55,986          | 0.056            | 3,527,232        | 3.53              | 0.016    |
| Lpn-Lens                                                                                       | 70,708          | 0.071            | 3,345,687        | 3.35              | 0.021    |
| Lpn-Lorraine                                                                                   | 53,380          | 0.053            | 3,467,254        | 3.47              | 0.015    |
| A15_Gt12(84)_Ps                                                                                | 55,931          | 0.056            | 3,495,260        | 3.50              | 0.016    |
| Lpn-HL06041035                                                                                 | 47,898          | 0.048            | 3,492,535        | 3.49              | 0.014    |
| Lpn-D7631                                                                                      | 45,673          | 0.046            | 3,436,178        | 3.44              | 0.013    |
| Lpn-D7630                                                                                      | 45,673          | 0.046            | 3,444,702        | 3.44              | 0.013    |
| Lpn-D7632                                                                                      | 45,674          | 0.046            | 3,435,648        | 3.44              | 0.013    |
| H34_Gt22(102)_D                                                                                | 43,272          | 0.043            | 3,403,136        | 3.40              | 0.013    |
| H29_Gt22(100)_D                                                                                | 43,243          | 0.043            | 3,403,391        | 3.40              | 0.013    |
| H35_Gt22(102)_D                                                                                | 43,310          | 0.043            | 3,402,267        | 3.40              | 0.013    |
| H39_Gt4(17)_D                                                                                  | 46,510          | 0.047            | 3,592,274        | 3.59              | 0.013    |
| A139_Gt4(17)_Ps                                                                                | 46,344          | 0.046            | 3,579,958        | 3.58              | 0.013    |
| Lpn-Paris                                                                                      | 46,188          | 0.046            | 3,503,610        | 3.50              | 0.013    |
| A5_Gt4(17)_Ps                                                                                  | 46,305          | 0.046            | 3,586,669        | 3.59              | 0.013    |
| Lpn-OLDA                                                                                       | 46,247          | 0.046            | 3,486,108        | 3.49              | 0.013    |
| A29_Gt6(18)_Ps                                                                                 | 45,065          | 0.045            | 3,626,550        | 3.63              | 0.012    |
| A131_Gt6(18)_Ps                                                                                | 45,061          | 0.045            | 3,548,746        | 3.55              | 0.013    |
| L10-091_Cl_Gt69(69)_D                                                                          | 45,825          | 0.046            | 3,687,459        | 3.69              | 0.012    |
| L12-317_Cl_Gt72(66)_D                                                                          | 45,264          | 0.045            | 3,516,737        | 3.52              | 0.013    |

|                        |        |       |           |      |       |
|------------------------|--------|-------|-----------|------|-------|
| L11-209_Cl_Gt29(27)_D  | 47,311 | 0.047 | 3,461,996 | 3.46 | 0.014 |
| L10-023_Cl_Gt75(49)_D  | 46,774 | 0.047 | 3,641,882 | 3.64 | 0.013 |
| L09-329_Cl_Gt75(49)_D  | 47,545 | 0.048 | 3,445,544 | 3.45 | 0.014 |
| Lpn-Pontiac            | 46,973 | 0.047 | 3,545,001 | 3.55 | 0.013 |
| L02-521_Cl_Gt29(27)_D  | 47,787 | 0.048 | 3,478,585 | 3.48 | 0.014 |
| Lpn-Toronto            | 46,576 | 0.047 | 3,573,898 | 3.57 | 0.013 |
| L02-465_Cl_Gt27(133)_D | 19,764 | 0.020 | 3,500,734 | 3.50 | 0.006 |
| L04-545_Cl_Gt40(47)_D  | 11,776 | 0.012 | 3,358,959 | 3.36 | 0.004 |
| A193_Gt40(47)_Ps       | 13,008 | 0.013 | 3,446,379 | 3.45 | 0.004 |
| A194_Gt40(47)_Ps       | 12,623 | 0.013 | 3,467,904 | 3.47 | 0.004 |
| A195_Gt40(47)_Ps       | 12,686 | 0.013 | 3,440,802 | 3.44 | 0.004 |
| A138_Gt9(92)_Ps        | 11,674 | 0.012 | 3,363,143 | 3.36 | 0.003 |
| A112_Gt10(93)_Ps       | 12,080 | 0.012 | 3,362,286 | 3.36 | 0.004 |
| A114_Gt10(93)_Ps       | 12,086 | 0.012 | 3,362,313 | 3.36 | 0.004 |
| A127_Gt10(93)_Ps       | 12,119 | 0.012 | 3,363,025 | 3.36 | 0.004 |
| A108_Gt10(93)_Ps       | 12,089 | 0.012 | 3,291,620 | 3.29 | 0.004 |
| H3_Gt14(31)_D          | 12,709 | 0.013 | 3,691,263 | 3.69 | 0.003 |
| H23_Gt14(30)_D         | 12,715 | 0.013 | 3,783,853 | 3.78 | 0.003 |
| H1_Gt14(31)_D          | 12,712 | 0.013 | 3,654,038 | 3.65 | 0.003 |
| H2_Gt14(31)_D          | 12,712 | 0.013 | 3,650,216 | 3.65 | 0.003 |
| Lpn-Corby              | 8,569  | 0.009 | 3,576,470 | 3.58 | 0.009 |
| L06-153_Cl_Gt71(135)_D | 11,960 | 0.012 | 3,405,980 | 3.41 | 0.012 |
| L06-129_Cl_Gt71(135)_D | 11,957 | 0.012 | 3,406,112 | 3.41 | 0.012 |
| A166_Gt8(142)_Ps       | 13,650 | 0.014 | 3,353,128 | 3.35 | 0.014 |
| L04-041_Cl_Gt30(137)_D | 14,500 | 0.015 | 3,522,671 | 3.52 | 0.015 |
| L05-341_Cl_Gt8(132)_D  | 13,146 | 0.013 | 3,410,856 | 3.41 | 0.013 |

**Table S5: Specific genes for each *L. pneumophila* isolate (hypothetical proteins were excluded )**

| Isolate designation | Gene No.           | Protein function                                       |
|---------------------|--------------------|--------------------------------------------------------|
| L09-313_C1_Gt8      |                    |                                                        |
| 4(116)_D            | O6C93_01440        | TolC family protein                                    |
| L01-443_C1_Gt6      |                    |                                                        |
| 4(74)_D             | O6D81_11770        | IS6 family transposase                                 |
|                     | O6D81_12360        | PHA synthase                                           |
|                     | O6D81_12420        | c-type cytochrome                                      |
|                     | O6D81_12425        | c-type cytochrome                                      |
|                     | O6D81_12430        | c-type cytochrome                                      |
|                     | O6D81_12440        | TerC family protein                                    |
|                     | <b>O6D81_12455</b> | <b>reverse transcriptase domain-containing protein</b> |
|                     | <b>O6D81_12640</b> | <b>MBL fold metallo-hydrolase</b>                      |
|                     | O6D81_12660        | heavy metal-binding domain-containing protein          |
|                     | O6D81_12690        | TolC family protein                                    |
|                     | O6D81_12705        | efflux RND transporter permease subunit                |
|                     | <b>O6D81_12815</b> | <b>MBL fold metallo-hydrolase</b>                      |
|                     | O6D81_12840        | GGDEF domain-containing protein                        |
|                     | O6D81_12860        | TolC family protein                                    |
|                     | O6D81_12870        | efflux RND transporter permease subunit                |
|                     | O6D81_12935        | efflux RND transporter permease subunit                |
|                     | O6D81_12945        | efflux RND transporter permease subunit                |
|                     | O6D81_12955        | TolC family protein                                    |
|                     | O6D81_12520        | 2Fe-2S iron-sulfur cluster-binding protein             |
|                     | O6D81_12955        | TolC family protein                                    |
|                     | O6D81_15015        | efflux RND transporter permease subunit                |
| A129_Gt64           |                    |                                                        |
| (74)_Ps             | <b>O6D13_00025</b> | <b>Antitoxin igA-2</b>                                 |
|                     | O6D13_00035        | Tyrosine recombinase XerC                              |
|                     | O6D13_00040        | ORF6N domain protein                                   |
|                     | O6D13_00085        | GGDEF domain-containing protein                        |
|                     | O6D13_00090        | Tn3 family transposase                                 |
|                     | O6D13_00095        | recombinase family protein                             |
|                     | O6D13_00100        | alpha/beta hydrolase                                   |
|                     | O6D13_00115        | response regulator                                     |
|                     | O6D13_00125        | zinc ribbon domain-containing protein                  |
|                     | O6D13_00140        | efflux RND transporter periplasmic adaptor subunit     |

|                       |                    |                                                                     |
|-----------------------|--------------------|---------------------------------------------------------------------|
|                       | <b>O6D13_10510</b> | <b>TolC family protein</b>                                          |
|                       | <b>O6D13_00230</b> | <b>ParB/RepB/Spo0J family partition protein</b>                     |
|                       | O6D13_00290        | carbon storage regulator CsrA                                       |
|                       | O6D13_00355        | TIGR03752 family integrating conjugative element protein            |
|                       | <b>O6D13_00365</b> | <b>conjugative transfer ATPase</b>                                  |
|                       | <b>O6D13_00375</b> | <b>TIGR03756 family integrating conjugative element protein</b>     |
|                       | O6D13_00380        | integrating conjugative element protein                             |
|                       | O6D13_00385        | conjugal transfer protein TraG N-terminal domain-containing protein |
|                       | O6D13_00410        | DNA topoisomerase III                                               |
|                       | O6D13_00470        | integrase domain-containing protein                                 |
|                       | O6D13_03035        | integrase domain-containing protein                                 |
|                       | <b>O6D13_03065</b> | <b>ATP-binding cassette domain-containing protein</b>               |
|                       | O6D13_03090        | efflux RND transporter periplasmic adaptor subunit                  |
|                       | O6D13_03095        | efflux RND transporter permease subunit                             |
|                       | O6D13_03150        | tyrosine-type recombinase/integrase                                 |
|                       | O6D13_03225        | DUF4156 domain-containing protein                                   |
|                       | O6D13_13310        | single-stranded DNA-binding protein                                 |
|                       | <b>O6D13_13975</b> | <b>lpg2844 family Dot/Icm T4SS effector</b>                         |
|                       | O6D13_14710        | IS21 family transposase                                             |
| H29_Gt22(100)_D       | O6D14_10380        | HipA N-terminal domain-containing protein                           |
| H39_Gt4(17)_D         | O6D15_00630        | ACR3 family arsenite efflux transporter                             |
|                       | O6D15_00635        | arsenate reductase ArsC                                             |
|                       | <b>O6D15_00640</b> | <b>ArsI/CadI family heavy metal resistance metalloenzyme</b>        |
|                       | <b>O6D15_00645</b> | <b>metalloregulator ArsR/SmtB family transcription factor</b>       |
|                       | O6D15_06785        | Tn3 family transposase                                              |
| A139_Gt4(17)_Ps       | <b>O6D12_04050</b> | <b>cell division protein FtsI/penicillin binding protein 2</b>      |
| A5_Gt4(17)_Ps         | <b>O6C87_09020</b> | <b>SdhB protein, substrate of the Dot/Icm system</b>                |
| A29_Gt6(18)_Ps        | O6D23_02780        | cation diffusion facilitator family transporter                     |
|                       | <b>O6D23_02795</b> | <b>type II toxin-antitoxin system HicB family antitoxin</b>         |
|                       | O6D23_02850        | patatin-like phospholipase family protein                           |
|                       | O6D23_02855        | DUF3734 domain-containing protein                                   |
|                       | <b>O6D23_02870</b> | <b>helix-turn-helix transcriptional regulator</b>                   |
|                       | O6D23_02910        | ATP-binding protein                                                 |
|                       | <b>O6D23_02915</b> | <b>ParA family protein</b>                                          |
|                       | O6D23_02945        | TraY domain-containing protein                                      |
|                       | O6D23_05230        | MFS transporter                                                     |
| L09-329_Cl_Gt75(49)_D | O6C51_05560        | HNH endonuclease signature motif containing protein                 |

|                               |                          |                                                              |
|-------------------------------|--------------------------|--------------------------------------------------------------|
| L11-<br>209_C1_Gt2<br>9(27)_D | <b>O6C51_05570</b>       | <b>helix-turn-helix transcriptional regulator</b>            |
|                               | O6C51_14225              | BREX-1 system adenine-specific DNA-methyltransferase PglX    |
|                               | O6C51_14230              | BREX-1 system phosphatase PglZ type A                        |
| L02-<br>521_C1_Gt2<br>9(27)_D | <b>O6D35_07945</b>       | <b>DNA repair exonuclease</b>                                |
|                               | O6D35_07950              | AAA family ATPase                                            |
|                               | O6D35_10455              | septation initiation protein                                 |
| L12-<br>317_C1_Gt7<br>2(66)_D | <b>L02_521_01364</b>     | <b>type IV pilus biogenesis protein PilQ</b>                 |
|                               | <b>O6D27_09325</b>       | <b>pilus assembly protein FimV</b>                           |
|                               | O6D27_13310              | T4SS effector NAD-dependent ubiquitin ligase SdeA            |
| L10-<br>091_C1_Gt6<br>9(69)_D | <b>L02_521_02661</b>     | <b>SidE phosphodiesterase domain-containing protein</b>      |
|                               | O6D34_00100              | ATP-binding protein                                          |
|                               | O6D34_07330              | helicase-related protein                                     |
| L10-<br>091_C1_Gt6<br>9(69)_D | O6D34_07345              | DEAD/DEAH box helicase family protein                        |
|                               | O6E59_01085              | macro domain-containing protein                              |
|                               | O6E59_10395              | GNAT family N-acetyltransferase                              |
|                               | O6E59_10490              | diguanylate cyclase                                          |
|                               | O6E59_10495              | CZB domain-containing protein                                |
|                               | O6E59_10500              | GGDEF domain-containing protein                              |
|                               | <b>O6E59_10515</b>       | <b>class I SAM-dependent methyltransferase</b>               |
|                               | O6E59_10550              | FIST C-terminal domain-containing protein                    |
|                               | <b>O6E59_10555</b>       | <b>DHA2 family efflux MFS transporter permease subunit</b>   |
|                               | <b>O6E59_10560</b>       | <b>HlyD family secretion protein</b>                         |
|                               | <b>O6E59_10565</b>       | <b>MarR family transcriptional regulator</b>                 |
|                               | <b>O6E59_10570</b>       | <b>efflux transporter outer membrane subunit</b>             |
|                               | O6E59_10575              | sodium:calcium antiporter                                    |
|                               | O6E59_10585              | HlyD family efflux transporter periplasmic adaptor subunit   |
|                               | O6E59_10590              | ribosome-associated ATPase/putative transporter RbbA         |
|                               | O6E59_10595              | ABC transporter permease                                     |
|                               | <b>O6E59_10625</b>       | <b>Hsp20/alpha crystallin family protein</b>                 |
|                               | O6E59_10645              | class I SAM-dependent methyltransferase                      |
|                               | <b>O6E59_10650</b>       | <b>type II toxin-antitoxin system PemK/MazF family toxin</b> |
|                               | O6E59_13710              | GNAT family N-acetyltransferase                              |
| L10-<br>023_C1_Gt7<br>5(49)_D | <b>Lpn-L10-023_00139</b> | <b>SdhB protein, substrate of the Dot/Icm system</b>         |
|                               | Lpn-L10-023_00204        | N-6 DNA Methylase                                            |



|                          |                                                                                |
|--------------------------|--------------------------------------------------------------------------------|
| Lpn-L10-023_00228        | Inner membrane protein YedI                                                    |
| <b>Lpn-L10-023_00286</b> | <b>heme oxygenase</b>                                                          |
| <b>Lpn-L10-023_00290</b> | <b>heavy metal transporting P-type ATPase, cation transporting</b>             |
| Lpn-L10-023_00336        | nicotinate phosphoribosyltransferase                                           |
| Lpn-L10-023_00381        | translation elongation factor Tu (EF-Tu)                                       |
| <b>Lpn-L10-023_00444</b> | <b>SdhA, substrate of the Dot/Icm system</b>                                   |
| Lpn-L10-023_00468        | signal recognition particle protein Ffh                                        |
| Lpn-L10-023_00607        | dihydrolipoamide succinyltransferase                                           |
| Lpn-L10-023_00761        | DNA topoisomerase IV subunit B                                                 |
| Lpn-L10-023_00967        | A/G specific adenine glycosylase                                               |
| <b>Lpn-L10-023_00995</b> | <b>penicillin binding protein 1A</b>                                           |
| Lpn-L10-023_01186        | DNA integration/recombination/inversion protein                                |
| <b>Lpn-L10-023_01251</b> | <b>permeases of drug/transporter</b>                                           |
| Lpn-L10-023_01275        | 2-hydroxy-6-oxo-6-phenylhexa-2,4-dienoate hydrolase                            |
| Lpn-L10-023_01447        | thymidylate kinase                                                             |
| Lpn-L10-023_01448        | thymidylate kinase                                                             |
| <b>Lpn-L10-023_01576</b> | <b>(type IV) pilus assembly protein PilC</b>                                   |
| <b>Lpn-L10-023_01578</b> | <b>type 4 (IV) prepilin-like protein leader peptide processing enzyme PilD</b> |
| Lpn-L10-023_01590        | glutamate-1-semialdehyde-2,1-aminomutase                                       |
| Lpn-L10-023_01637        | TolA colicin import membrane protein                                           |
| Lpn-L10-023_02146        | transporter, Zip family                                                        |
| Lpn-L10-023_02235        | membrane protein                                                               |
| Lpn-L10-023_02328        | sensory box histidine kinase/response regulator                                |
| Lpn-L10-023_02334        | polyketide synthase, type I                                                    |
| Lpn-L10-023_02335        | polyketide synthase, type I                                                    |
| Lpn-L10-023_02336        | polyketide synthase, type I                                                    |
| Lpn-L10-023_02370        | purine NTPase, putative                                                        |
| Lpn-L10-023_02384        | 3-oxoacyl-(acyl carrier protein) synthase III                                  |
| Lpn-L10-023_02501        | hypothetical protein                                                           |
| <b>Lpn-L10-023_02530</b> | <b>Legionella vir region protein</b>                                           |
| Lpn-L10-023_02531        | global regulator (carbon storage regulator)                                    |
| Lpn-L10-023_02560        | cellulose synthase subunit BcsC                                                |
| Lpn-L10-023_02566        | Na(+)/H(+) antiporter 1 (Sodium/proton antiporter 1)                           |
| Lpn-L10-023_02568        | integral membrane protein                                                      |
| Lpn-L10-023_02572        | OsmC-like protein                                                              |
| Lpn-L10-023_02574        | potassium efflux system KefA                                                   |
| Lpn-L10-023_02575        | copper efflux ATPase                                                           |
| Lpn-L10-023_02657        | Na(+)/H(+) antiporter 1 (Sodium/proton antiporter 1)                           |
| Lpn-L10-023_02720        | hypothetical, patatin-like phospholipase                                       |
| Lpn-L10-023_02756        | glutathione S-transferase                                                      |

|                        |                          |                                                                     |
|------------------------|--------------------------|---------------------------------------------------------------------|
|                        | Lpn-L10-023_02780        | hydrogenase expression/formation protein                            |
|                        | Lpn-L10-023_02781        | hydrogenase expression/formation protein                            |
|                        | <b>Lpn-L10-023_02834</b> | <b>outer membrane efflux protein (RND multidrug efflux)</b>         |
|                        | Lpn-L10-023_02847        | hypothetical protein with coiled coil domain protein                |
|                        | Lpn-L10-023_02848        | hypothetical protein with coiled coil domain protein                |
|                        | Lpn-L10-023_03007        | phospho-N-acetylmuramoyl- pentapeptidetransferase                   |
|                        | Lpn-L10-023_03012        | chromosome segregation SMC protein                                  |
|                        | Lpn-L10-023_03084        | cation transporting ATPase PacS                                     |
|                        | Lpn-L10-023_03135        | uroporphyrinogen III methylase                                      |
|                        | Lpn-L10-023_03137        | protoporphyrinogen IX and coproporphyrinogen III oxidase HemY       |
|                        | Lpn-L10-023_03338        | outer membrane efflux protein                                       |
|                        | Lpn-L10-023_03386        | peroxynitrite reductase, AhpC/Tsa family                            |
|                        | Lpn-L10-023_03416        | tetrapyrrole (corrin/porphyrin) methylase                           |
|                        | Lpn-L10-023_03423        | GTP binding protein in thiophene and furan oxidation (GTPase)       |
| H23_Gt14(30)_D         | <b>O6C86_14460</b>       | <b>efflux RND transporter permease subunit</b>                      |
|                        | <b>O6C86_14460</b>       | <b>efflux RND transporter permease subunit</b>                      |
|                        | O6C86_10150              | conjugal transfer protein TraH                                      |
|                        | <b>O6C86_09200</b>       | <b>TraU family protein</b>                                          |
|                        | <b>O6C86_09230</b>       | <b>TraE/TraK family type IV conjugative transfer system protein</b> |
|                        | <b>O6C86_09235</b>       | <b>TraE/TraK family type IV conjugative transfer system protein</b> |
|                        | O6C86_10150              | conjugal transfer protein TraH                                      |
|                        | O6C86_17105              | LuxR C-terminal-related transcriptional regulator                   |
|                        | O6C86_17105              | LuxR C-terminal-related transcriptional regulator                   |
|                        | H23_02368                | lipolytic enzyme                                                    |
|                        | O6C86_17085              | DNA adenine methylase                                               |
|                        |                          | NADPH-dependent 7-cyano-7-deazaguanine reductase                    |
|                        | O6C86_17090              | QueF                                                                |
|                        |                          |                                                                     |
| H3_Gt14(31)_D          | <b>LpnH3D14_00327</b>    | <b>SdbA protein, putative substrate of the Dot/Icm system</b>       |
|                        | LpnH3D14_01633           | TnpA transposase                                                    |
| H1_Gt14(31)_D          | O6C83_15670              | integrase domain-containing protein                                 |
|                        | O6C83_15670              | integrase domain-containing protein                                 |
| L04-041_Cl_Gt30(137)_D | <b>L04_041_00187</b>     | <b>cadmium translocating P-type ATPase CadA</b>                     |
|                        | O6C82_01235              | conjugative coupling factor TraD, PFGI-1 class                      |
|                        | L04_041_00251            | conjugative coupling factor TraD                                    |
|                        | O6C82_01990              | ABC transporter permease                                            |
|                        | O6C82_02290              | AAA family ATPase                                                   |
|                        | O6C82_03960              | (outer) membrane protein                                            |
|                        | O6C82_13255              | GIY-YIG nuclease superfamily protein                                |

|                        |                      |                                                                            |
|------------------------|----------------------|----------------------------------------------------------------------------|
|                        | L04_041_02904        | SdcA                                                                       |
|                        | <b>L04_041_02906</b> | <b>SidC protein (substrate of the Dot/Icm system)</b>                      |
| L02-465_Cl_Gt27(133)_D | O6D28_09245          | ATP-binding protein                                                        |
|                        | O6D28_09275          | MFS transporter                                                            |
|                        | O6D28_09280          | peptide deformylase                                                        |
|                        | O6D28_14745          | alpha/beta fold hydrolase                                                  |
|                        | O6D28_10135          | FAD-binding oxidoreductase                                                 |
|                        | O6D28_10265          | GGDEF domain-containing protein                                            |
|                        | O6D28_10270          | diguanylate cyclase                                                        |
|                        | O6D28_10315          | cation-translocating P-type ATPase                                         |
|                        | O6D28_05830          | ISAs1 family transposase                                                   |
|                        | O6D28_10095          | F0F1 ATP synthase subunit beta                                             |
|                        | O6D28_14780          | F0F1 ATP synthase subunit A                                                |
|                        | O6D28_14785          | F0F1 ATP synthase subunit A                                                |
| A194_Gt40(47)_Ps       | LpnA194_02940        | hypothetical histidine-rich protein                                        |
| A193_Gt40(47)_Ps       | O6C92_00445          | translocation/assembly module TamB domain-containing protein               |
|                        | O6C92_09225          | amino acid dehydrogenase                                                   |
|                        | A193_02478           | Primosomal protein N' (replication factor Y)                               |
|                        | O6C92_15530          | HslU--HslV peptidase ATPase subunit                                        |
| L05-341_Cl_Gt8(132)_D  | O6C52_01120          | AAA family ATPase                                                          |
|                        | O6C52_06635          | cyclic nucleotide-binding domain-containing protein                        |
|                        | <b>O6C52_11395</b>   | <b>Vir protein</b>                                                         |
|                        | <b>L05_341_02307</b> | <b>type I restriction enzyme EcoKI subunit R</b>                           |
|                        | <b>L05_341_02308</b> | <b>Plasmid maintenance system killer protein</b>                           |
|                        | O6C52_11530          | helix-turn-helix domain-containing protein                                 |
|                        | O6C52_11540          | nucleotide-binding protein                                                 |
| L06-153_Cl_Gt71(135)_D | O6D25_07255          | tetratricopeptide repeat protein                                           |
| A138_Gt9(92)_Ps        | <b>A138_02923</b>    | <b>Multifunctional virulence effector protein DrrA</b>                     |
| A127_Gt10(93)_Ps       | O6D26_08745          | NAD-dependent formate dehydrogenase                                        |
|                        | O6D26_08750          | NAD-dependent formate dehydrogenase                                        |
|                        | A127_02037           | sensory box protein, EAL domain, GGDEF domain, signal transduction protein |
| A166_Gt8(142)_Ps       | <b>O6C96_02340</b>   | <b>IcmE (DotG)</b>                                                         |
|                        | <b>O6C96_02805</b>   | <b>cyclic nucleotide-binding domain-containing protein</b>                 |
|                        | O6C96_10115          | serine/threonine protein kinase                                            |

|                               |             |                                     |
|-------------------------------|-------------|-------------------------------------|
| L04-<br>545_C1_Gt4<br>0(47)_D | O6C96_10125 | serine/threonine-protein kinase     |
|                               | O6C96_13195 | hypothetical histidine-rich protein |
|                               | O6D22_05960 | Ankyrin repeats                     |
|                               | O6D22_07115 | septation initiation protein        |

---

| <b>Table S6: Nucleotide Polymorphisms in cluster six of <i>L. pneumophila</i> isolates H1, H2, and H23 from the HZI DWSS relative to the H3 PacBio reference sequence obtained.</b> |                                     |                                      |                  |                                                             |                                                                |                    |                                 |
|-------------------------------------------------------------------------------------------------------------------------------------------------------------------------------------|-------------------------------------|--------------------------------------|------------------|-------------------------------------------------------------|----------------------------------------------------------------|--------------------|---------------------------------|
| <b>Nucleotide Polymorphism</b>                                                                                                                                                      | <b>Label (locus tag) ref genome</b> | <b><i>L. pneumophila</i> Isolate</b> | <b>Gene Name</b> | <b>Gene Product</b>                                         | <b>Gene Function</b>                                           | <b>Length (bp)</b> | <b>Virulence Similarity (%)</b> |
| A → T                                                                                                                                                                               | LpnH3 D14_00006                     | H2                                   | <i>ppeA</i>      | Biosynthetic arginine decarboxylase                         | Intracellular Growth                                           | 1,891              | NV                              |
| C → T                                                                                                                                                                               | LpnH3 D14_00027                     | H23                                  | <i>yhdG_1</i>    | Amino acid transporter                                      | Survival <i>in vivo</i>                                        | 1,391              | NV                              |
| C → T                                                                                                                                                                               | LpnH3 D14_00935                     | H1, H2, H23                          | <i>bepC</i>      | Outer membrane efflux protein                               | Survive inside the host cells, restores drug efflux            | 1,724              | NV                              |
| T → G                                                                                                                                                                               | LpnH3 D14_00978                     | H1                                   | <i>mmgC</i>      | Acyl-CoA dehydrogenase                                      |                                                                | 1,154              | NV                              |
| A → G                                                                                                                                                                               | LpnH3 D14_01656                     | H23                                  |                  | Alpha/beta hydrolase                                        |                                                                | 983                | NV                              |
| C → T                                                                                                                                                                               | LpnH3 D14_02694                     | H1, H2, H23                          | <i>ankF</i>      | Dot/Icm type IV secretion system effector (Ankyrin repeats) | Host microbe interaction, Intracellular replication            | 2,765              | 96                              |
| G → T                                                                                                                                                                               | LpnH3 D14_02706                     | H23                                  |                  | Aspartyl/Asparaginyl beta hydrolase                         |                                                                | 719                | NV                              |
| C → T                                                                                                                                                                               | LpnH3 D14_02929                     | H1, H2, H23                          | <i>dotA</i>      | Phagosome trafficking protein DotA                          | Bacterial replication, virulence, Evasion of Endocytic pathway | 3,119              | 79                              |

|                        |                        |     |  |                         |  |       |    |
|------------------------|------------------------|-----|--|-------------------------|--|-------|----|
| C → T                  | LpnH3<br>D14_03<br>123 | H23 |  | Hypothetical<br>protein |  | 1,289 | NV |
| NV: Non-Virulence Gene |                        |     |  |                         |  |       |    |

**Table S7: Gene content according to MAUVE aligner in the studied areas. Hypothetical proteins were excluded**

| Locus Tag     | Gene Name | Product                                                                                                  | Length (bp) |
|---------------|-----------|----------------------------------------------------------------------------------------------------------|-------------|
| <b>Area 1</b> |           |                                                                                                          |             |
| LpnA194_02079 |           | Acetyltransferase (GNAT) family protein                                                                  | 437         |
| LpnA194_02080 | dpnM      | Modification methylase DpnIIA                                                                            | 1,412       |
| LpnA194_02081 | dlpA_1    | DlpA protein                                                                                             | 719         |
| LpnA194_02082 |           | Phosphotransferase enzyme family protein                                                                 | 968         |
| LpnA194_02083 |           | aminoglycoside phosphotransferase                                                                        | 1,436       |
| LpnA194_02085 |           | shikimate kinase                                                                                         | 779         |
| LpnA194_02086 |           | Enterochelin esterase                                                                                    | 1,415       |
| LpnA194_02088 | abcT3_4   | ABC transporter, ATP binding protein                                                                     | 1,547       |
| LpnA194_02090 |           | transcriptional regulator, MerR family, mercury resistance                                               | 944         |
| LpnA194_02091 |           | beta-lactamase AmpS                                                                                      | 800         |
| LpnA194_02092 | ftsI4_2   | cell division protein FtsI/penicillin binding protein 2                                                  | 1,922       |
| LpnA194_02093 | mecI_2    | Methicillin resistance regulatory protein mecI                                                           | 422         |
| LpnA194_02094 |           | transcriptional regulator SkgA, mercury resistance                                                       | 749         |
| LpnA194_02097 |           | acetyltransferase, GNAT family                                                                           | 602         |
| LpnA194_02098 |           | reverse transcriptase                                                                                    | 1,556       |
| LpnA194_02100 |           | acetyltransferase, GNAT family                                                                           | 482         |
| LpnA194_02101 | grpB_2    | glutamate rich protein GrpB                                                                              | 956         |
| LpnA194_02102 |           | nucleotidyltransferase PLUS glutamate rich protein GrpB PLUS ribosomal protein alanine acetyltransferase | 794         |
| LpnA194_02104 |           | pyridoxamine 5'-phosphate oxidase                                                                        | 581         |
| LpnA194_02105 |           | phage repressor                                                                                          | 622         |
| LpnA194_02106 | lvrA_2    | Legionella vir region protein                                                                            | 872         |
| LpnA194_02107 | lvrC      | Legionella vir region protein                                                                            | 197         |
| LpnA194_02108 |           | putative exported protein                                                                                | 434         |
| LpnA194_02121 |           | Type IV secretory protein VirB4 component                                                                | 2,774       |
| LpnA194_02122 |           | TraU protein                                                                                             | 995         |
| LpnA194_02123 |           | membrane protein, Tfp pilus assembly, pilus retraction ATPase PilT                                       | 1,382       |
| LpnA194_02127 |           | conjugative coupling factor TraD                                                                         | 2,006       |
| LpnA194_02129 |           | Putative HTH-type transcriptional regulator/MT0914                                                       | 572         |

|                |         |                                                                                                                     |       |
|----------------|---------|---------------------------------------------------------------------------------------------------------------------|-------|
| LpnA194_02130  |         | Avidin family protein                                                                                               | 413   |
| LpnA194_02132  |         | putative secreted esterase                                                                                          | 1,556 |
| LpnA194_02133  |         | Bacterial regulatory proteins, luxR family                                                                          | 800   |
| LpnA194_02134  | murE3_1 | UDP-N-acetylmuramyl tripeptide synthase                                                                             | 1,226 |
| LpnA194_02137  | aph_2   | spectinomycin phosphotransferase                                                                                    | 995   |
| LpnA194_02138  |         | glyoxylase domain hypothetical protein                                                                              | 365   |
| LpnA194_02139  |         | short chain dehydrogenase                                                                                           | 734   |
| LpnA194_02140  | yafP    | putative N-acetyltransferase YafP                                                                                   | 1,697 |
| LpnH3D14_02136 | fni     | isopentenyl-diphosphate delta-isomerase                                                                             | 1,028 |
| LpnH3D14_02137 | mvaA    | hydroxymethylglutaryl CoA reductase                                                                                 | 1,298 |
| LpnH3D14_02139 |         | tRNA-Lys                                                                                                            | 75    |
| LpnH3D14_02140 |         | tRNA-Lys                                                                                                            | 75    |
| LpnH3D14_02141 |         | tRNA-Arg                                                                                                            | 76    |
| LpnH3D14_02142 |         | site specific recombinase                                                                                           | 1,160 |
| LpnH3D14_02143 | nucS    | Endonuclease NucS                                                                                                   | 1,004 |
| LpnH3D14_02144 |         | Acetyltransferase (GNAT) family protein                                                                             | 485   |
| LpnH3D14_02145 |         | proline/betaine transport protein like protein                                                                      | 1,274 |
| LpnH3D14_02146 |         | putative acetyltransferase                                                                                          | 512   |
| LpnH3D14_02147 |         | lipolytic enzyme                                                                                                    | 686   |
| LpnH3D14_02148 |         | transcription regulator protein, response regulator containing CheY-like receiver domain and HTH DNA-binding domain | 803   |
| LpnH3D14_02150 | tylM1   | dTDP-3-amino-3,6-dideoxy-alpha-D-glucopyranose N,N-dimethyltransferase                                              | 824   |
| LpnH3D14_02152 |         | topology modulation protein                                                                                         | 542   |
| LpnH3D14_02154 |         | aminoglycoside 6'-N-acetyltransferase                                                                               | 545   |
| LpnH3D14_02155 |         | acetyltransferase, GNAT family                                                                                      | 554   |
| LpnH3D14_02156 |         | transcriptional regulator, MerR family, mercury resistance                                                          | 1,040 |
| LpnH3D14_02157 |         | methyltransferase                                                                                                   | 881   |
| LpnH3D14_02158 |         | Acetyltransferase (GNAT) family protein                                                                             | 419   |
| LpnH3D14_02159 |         | recombination protein F                                                                                             | 1,160 |
| LpnH3D14_02160 |         | Cupin domain protein                                                                                                | 386   |
| LpnH3D14_02162 |         | O-antigen acetylase                                                                                                 | 1,148 |
| LpnH3D14_02163 |         | serine/threonine protein kinase                                                                                     | 1,001 |
| LpnH3D14_02164 | phaB_4  | acetoacetyl CoA reductase                                                                                           | 782   |
| LpnH3D14_02165 |         | sepiapterin reductase                                                                                               | 794   |
| LpnH3D14_02165 | dpmM    | Modification methylase DpmM                                                                                         | 1,412 |
| LpnH3D14_02168 | dlpA_1  | DlpA protein                                                                                                        | 716   |
| LpnH3D14_02169 |         | Phosphotransferase enzyme family protein                                                                            | 968   |



| LpnH3D14_02170                                                                                                              |                  | aminoglycoside phosphotransferase                                                                                   | 1,436              |
|-----------------------------------------------------------------------------------------------------------------------------|------------------|---------------------------------------------------------------------------------------------------------------------|--------------------|
| LpnH3D14_02172                                                                                                              | aroK_2           | shikimate kinase                                                                                                    | 779                |
| LpnH3D14_02173                                                                                                              | mdtK             | Multidrug resistance protein MdtK                                                                                   | 1,364              |
| LpnH3D14_02174                                                                                                              |                  | transcriptional regulator, LysR family                                                                              | 863                |
| LpnH3D14_02175                                                                                                              |                  | major facilitator superfamily transporter                                                                           | 1,175              |
| LpnH3D14_02176                                                                                                              |                  | Peptidase family S41                                                                                                | 1,337              |
| LpnH3D14_02177                                                                                                              |                  | phage repressor                                                                                                     | 662                |
| LpnH3D14_02178                                                                                                              | lvrA_2           | Legionella vir region protein                                                                                       | 872                |
| LpnH3D14_02179                                                                                                              | lvrC_2           | Legionella vir region protein                                                                                       | 197                |
| LpnH3D14_02180                                                                                                              |                  | putative exported protein                                                                                           | 434                |
| LpnH3D14_02193                                                                                                              |                  | Type IV secretory protein VirB4 component                                                                           | 2,774              |
| LpnH3D14_02194                                                                                                              |                  | TraU protein                                                                                                        | 977                |
| LpnH3D14_02195                                                                                                              |                  | membrane protein, Tfp pilus assembly, pilus retraction ATPase PilT                                                  | 1,382              |
| LpnH3D14_02196                                                                                                              |                  | membrane protein                                                                                                    | 1,568              |
| <b>Table S7: Gene content according to MAUVE aligner in the studied areas. Hypothetical proteins were excluded (Area 2)</b> |                  |                                                                                                                     |                    |
| <b>Locus Tag</b>                                                                                                            | <b>Gene Name</b> | <b>Product</b>                                                                                                      | <b>Length (bp)</b> |
| corby_02494                                                                                                                 |                  | lipolytic enzyme                                                                                                    | 683                |
| corby_02495                                                                                                                 |                  | transcription regulator protein, response regulator containing CheY-like receiver domain and HTH DNA-binding domain | 803                |
| Corby_02499                                                                                                                 | cadA_2           | cadmium translocating P-type ATPase CadA                                                                            | 503                |
| Corby_02500                                                                                                                 |                  | cadmium efflux ATPase                                                                                               | 1,433              |
| Corby_02502                                                                                                                 | cadA_3           | cadmium translocating P-type ATPase CadA                                                                            | 2,135              |
| Corby_02503                                                                                                                 | helA_2           | cobalt/zinc/cadmium efflux RND transporter, permease protein HelA                                                   | 3,149              |
| Corby_02504                                                                                                                 | helB_2           | cation efflux system HelB                                                                                           | 1,256              |
| Corby_02505                                                                                                                 | helC_2           | cobalt/zinc/cadmium efflux RND transporter, outer membrane protein                                                  | 1,244              |
| Corby_02506                                                                                                                 |                  | reverse transcriptase                                                                                               | 1,364              |
| Corby_02511                                                                                                                 |                  | reverse transcriptase                                                                                               | 1,199              |
| Corby_02512                                                                                                                 |                  | transposase IS4                                                                                                     | 1,460              |
| Corby_02513                                                                                                                 |                  | phage repressor                                                                                                     | 662                |
| Corby_02514                                                                                                                 | lvrA_2           | Legionella vir region protein                                                                                       | 872                |
| Corby_02515                                                                                                                 | lvrB_2           | Legionella vir region protein                                                                                       | 383                |
| Corby_02516                                                                                                                 | lvrC             | Legionella vir region protein                                                                                       | 197                |
| Corby_02517                                                                                                                 |                  | putative exported protein                                                                                           | 434                |
| Corby_02528                                                                                                                 |                  | exported membrane protein                                                                                           | 1,313              |
| Corby_02530                                                                                                                 |                  | Type IV secretory protein VirB4 component                                                                           | 2,774              |

|             |  |                                                                    |       |
|-------------|--|--------------------------------------------------------------------|-------|
| Corby_02531 |  | TraU protein                                                       | 995   |
| Corby_02532 |  | membrane protein, Tfp pilus assembly, pilus retraction ATPase PilT | 1,382 |
| Corby_02533 |  | membrane protein                                                   | 1,568 |
| Corby_02536 |  | conjugative coupling factor TraD                                   | 2,006 |

| Table S8: Genes of interest in genomic islands of <i>L. pneumophila</i> isolates as identified by IslandViewer4 |         |               |            |                  |                                                |
|-----------------------------------------------------------------------------------------------------------------|---------|---------------|------------|------------------|------------------------------------------------|
| Branch                                                                                                          | Isolate | Gene          | Locus tag  | Gene Length (bp) | Product                                        |
| 3<br>HL<br>06041085                                                                                             | H34     |               | H34_02359  | 965              | major outer membrane protein                   |
|                                                                                                                 |         |               |            |                  |                                                |
|                                                                                                                 |         | <i>tufA_2</i> | H34_02301  | 917              | translation elongation factor Tu (EF-Tu)       |
|                                                                                                                 |         |               | H34_02302  | 341              | preprotein translocase subunit SecE            |
|                                                                                                                 |         | <i>nusG</i>   | H34_02303  | 548              | transcription antitermination protein NusG     |
|                                                                                                                 |         | <i>rplK</i>   | H34_02304  | 434              | 50S ribosomal protein L11                      |
|                                                                                                                 |         | <i>rplA</i>   | H34_02305  | 695              | 50S ribosomal protein L1                       |
|                                                                                                                 |         | <i>rplJ</i>   | H34_02306  | 533              | 50S ribosomal protein L10                      |
|                                                                                                                 |         | <i>rplL</i>   | H34_02307  | 380              | 50S ribosomal protein L7/L12                   |
|                                                                                                                 |         | <i>rpoB</i>   | H34_02308  | 4,106            | DNA-directed RNA polymerase beta subunit       |
|                                                                                                                 |         | <i>rpoC</i>   | H34_02309  | 4,247            | DNA-directed RNA polymerase subunit beta'      |
|                                                                                                                 |         | <i>rpsL</i>   | H34_02310  | 380              | 30S ribosomal protein S12                      |
|                                                                                                                 |         | <i>rpsG</i>   | H34_02311  | 527              | 30S ribosomal protein S7                       |
|                                                                                                                 |         | <i>fusA</i>   | H34_02312  | 2,084            | translation elongation factor G (EF-G)         |
|                                                                                                                 | H35     | <i>ccmC</i>   | H35_00671  | 755              | heme exporter protein CcmC                     |
|                                                                                                                 |         | <i>ccmD</i>   | H35_00670  | 158              | heme exporter protein CcmD                     |
|                                                                                                                 |         | <i>ccmE</i>   | H35_00669  | 431              | cytochrome c-type biogenesis protein CcmE      |
|                                                                                                                 |         | <i>ccmF</i>   | H35_00668  | 1,952            | cytochrome c-type biogenesis protein CcmF      |
|                                                                                                                 |         | <i>ccmG</i>   | H35_00667  | 533              | cytochrome C biogenesis protein                |
|                                                                                                                 |         | <i>ccmH</i>   | H35_00666  | 401              | c-type cytochrome biogenesis protein CcmH      |
|                                                                                                                 |         | <i>cycH</i>   | H35_00665  | 686              | cytochrome c type biogenesis protein CcmH      |
| 4<br>Paris                                                                                                      | A29     |               | A29_00568  | 206              | cold shock domain family protein               |
|                                                                                                                 | A5      |               | A5_02183   | 986              | Microvirus H protein (pilot protein)           |
|                                                                                                                 |         |               | A5_02184   | 1,541            | Bacteriophage replication gene A protein (GPA) |
|                                                                                                                 |         |               | A5_02185   | 260              | Phage protein C                                |
|                                                                                                                 |         |               | A5_02186   | 458              | Bacteriophage scaffolding protein D            |
|                                                                                                                 |         |               | A5_02187   | 116              | Microvirus J protein                           |
|                                                                                                                 | A139    |               | A139_02127 | 1,025            | Bacteriophage replication gene A protein (GPA) |
|                                                                                                                 |         |               | A139_02128 | 260              | Phage protein C                                |
|                                                                                                                 |         |               | A139_02129 | 458              | Bacteriophage scaffolding protein D            |
|                                                                                                                 |         |               | A139_02130 | 116              | Microvirus J protein                           |
|                                                                                                                 |         |               | A139_02131 | 1,283            | Capsid protein (F protein)                     |
|                                                                                                                 |         |               | A139_02132 | 527              | Major spike protein (G protein)                |
|                                                                                                                 |         |               | A139_02133 | 986              | Microvirus H protein (pilot protein)           |

|              |          |                |               |             |                                                            |       |                                                 |
|--------------|----------|----------------|---------------|-------------|------------------------------------------------------------|-------|-------------------------------------------------|
| 5<br>Pontiac | L10-091  | <i>hspC2_1</i> | L10-091_02122 | 491         | small heat shock protein HspC2                             |       |                                                 |
|              |          |                | L10-091_02123 | 587         | heat shock hsp20                                           |       |                                                 |
| 6<br>Alcoy   | L02-465  |                | L02-465_00734 | 425         | hemin binding protein Hbp                                  |       |                                                 |
|              | A194     | <i>cya</i>     | A194_00644    | 15,197      | Bifunctional hemolysin/adenylate cyclase precursor         |       |                                                 |
|              | A112     | <i>chuR</i>    | A112_02425    | 1,475       | Anaerobic sulfatase-maturing enzyme                        |       |                                                 |
|              | H23      | <i>ampG</i>    | H23_01834     | 1,247       | beta lactamase induction signal transducer AmpG            |       |                                                 |
|              |          |                | H23_02025     | 1,361       | metallo-beta lactamase family protein                      |       |                                                 |
|              |          |                | H23_01996     | 1,424       | Bacteriophage replication gene A protein (GPA)             |       |                                                 |
|              |          |                | H23_01997     | 260         | Phage protein C                                            |       |                                                 |
|              |          |                | H23_01998     | 458         | Bacteriophage scaffolding protein D                        |       |                                                 |
|              |          |                | H23_01999     | 116         | Microvirus J protein                                       |       |                                                 |
|              |          |                | H23_02000     | 1,283       | Capsid protein (F protein)                                 |       |                                                 |
|              |          |                | H23_02001     | 527         | Major spike protein (G protein)                            |       |                                                 |
|              |          |                | H23_02002     | 986         | Microvirus H protein (pilot protein)                       |       |                                                 |
|              |          |                | H1            | <i>ampG</i> | H1_02766                                                   | 1,247 | beta lactamase induction signal transducer AmpG |
|              |          |                |               |             | H1_00952                                                   | 1,361 | metallo-beta lactamase family protein           |
|              |          |                |               |             | H1_02730                                                   | 416   | Bacteriophage scaffolding protein D             |
|              | H1_02731 | 116            |               |             | Microvirus J protein                                       |       |                                                 |
|              | H1_02732 | 1,283          |               |             | Capsid protein (F protein)                                 |       |                                                 |
|              | H1_02733 | 527            |               |             | Major spike protein (G protein)                            |       |                                                 |
|              | H1_02734 | 986            |               |             | Microvirus H protein (pilot protein)                       |       |                                                 |
|              | H1_02735 | 1,541          |               |             | Bacteriophage replication gene A protein (GPA)             |       |                                                 |
|              | H2       |                | H2_02312      | 1,361       | metallo-beta lactamase family protein                      |       |                                                 |
|              | H3       |                | H3_03288      | 1,361       | metallo-beta lactamase family protein                      |       |                                                 |
|              | L06-129  | <i>htpX_3</i>  | L06-129_01854 | 965         | heat shock protein, protease HtpX                          |       |                                                 |
|              |          |                | L06-129_01853 | 470         | Phosphate-starvation-inducible E                           |       |                                                 |
|              |          | <i>trxA3_2</i> | L06-129_01852 | 440         | thioredoxin                                                |       |                                                 |
|              |          |                | L06-129_01848 | 569         | small HspC2 heat shock protein                             |       |                                                 |
|              |          | <i>cas1</i>    | L06-129_01845 | 968         | CRISPR-associated endonuclease Cas1                        |       |                                                 |
|              |          | <i>cas3</i>    | L06-129_01844 | 3,395       | CRISPR-associated nuclease/helicase Cas3 subtype I-F/YPEST |       |                                                 |
|              |          | <i>csy1</i>    | L06-129_01843 | 1,265       | CRISPR-associated protein Csy1                             |       |                                                 |
|              |          | <i>htpX_3</i>  | L06-129_01854 | 965         | heat shock protein, protease HtpX                          |       |                                                 |
|              |          |                | L06-129_01853 | 470         | Phosphate-starvation-inducible E                           |       |                                                 |
|              |          |                | L06-129_01848 | 569         | small HspC2 heat shock protein                             |       |                                                 |

**Table S9. Number and distribution of the 8 most frequently identified eukaryotic motifs and heat shock proteins (HSP) within the 55 *L. pneumophila* strains studied. Numbers represent the number of proteins containing the respective eukaryotic motif.**

| Strain                 | Ankyrin repeats | F-box | U-box | P-Kinase | LRR | P450 | SET | HAD | HSP |
|------------------------|-----------------|-------|-------|----------|-----|------|-----|-----|-----|
| A129_Gt64(74)_Ps       | 12              | 3     | 1     | 6        | 6   | 0    | 1   | 1   | 16  |
| A156_Gt64(74)_Ps       | 12              | 3     | 1     | 6        | 6   | 0    | 1   | 1   | 15  |
| L01-443_Cl_Gt64(74)_D  | 12              | 3     | 1     | 7        | 7   | 1    | 1   | 1   | 15  |
| L09-313_Cl_Gt84(116)_D | 12              | 3     | 1     | 6        | 6   | 0    | 1   | 1   | 16  |
| Lpn-LPE509             | 12              | 3     | 1     | 7        | 6   | 0    | 1   | 1   | 15  |
| Lpn-lpm7613            | 11              | 3     | 1     | 7        | 6   | 0    | 1   | 1   | 16  |
| Lpn-ATCC43290          | 12              | 3     | 1     | 6        | 6   | 0    | 1   | 1   | 16  |
| Lpn-Philadelphia1      | 12              | 3     | 1     | 7        | 6   | 0    | 1   | 1   | 15  |
| Lpn-Thunderbay         | 12              | 3     | 1     | 6        | 6   | 0    | 1   | 1   | 16  |
| A15_Gt12(84)_Ps        | 16              | 1     | 1     | 11       | 7   | 1    | 1   | 1   | 13  |
| Lpn-Lens               | 15              | 1     | 0     | 7        | 5   | 1    | 1   | 1   | 14  |
| Lpn-Lorraine           | 14              | 2     | 1     | 9        | 7   | 1    | 1   | 1   | 13  |
| H29_Gt22(100)_D        | 12              | 2     | 1     | 8        | 3   | 1    | 1   | 1   | 14  |
| H34_Gt22(102)_D        | 12              | 2     | 1     | 8        | 3   | 1    | 1   | 1   | 14  |
| H35_Gt22(102)_D        | 12              | 2     | 1     | 8        | 3   | 1    | 1   | 1   | 14  |
| Lpn-D7630              | 12              | 2     | 1     | 8        | 3   | 1    | 1   | 1   | 14  |
| Lpn-D7631              | 12              | 2     | 1     | 8        | 3   | 1    | 1   | 1   | 14  |
| Lpn-D7632              | 12              | 2     | 1     | 8        | 3   | 1    | 1   | 1   | 14  |
| Lpn-HL06041035         | 11              | 1     | 1     | 7        | 5   | 1    | 1   | 1   | 15  |
| A5_Gt4(17)_Ps          | 15              | 2     | 1     | 12       | 4   | 1    | 1   | 1   | 13  |
| A29_Gt6(18)_Ps         | 17              | 2     | 1     | 10       | 4   | 1    | 1   | 1   | 13  |
| A131_Gt6(18)_Ps        | 17              | 2     | 1     | 10       | 4   | 1    | 1   | 1   | 13  |
| A139_Gt4(17)_Ps        | 15              | 1     | 1     | 10       | 4   | 1    | 1   | 1   | 13  |
| H39_Gt4(17)_D          | 17              | 2     | 1     | 9        | 4   | 1    | 1   | 1   | 13  |
| Lpn-OLDA               | 16              | 2     | 1     | 11       | 4   | 1    | 1   | 1   | 13  |
| Lpn-Paris              | 16              | 2     | 1     | 11       | 4   | 1    | 1   | 1   | 13  |
| L02-521_Cl_Gt29(27)_D  | 13              | 2     | 1     | 11       | 3   | 1    | 1   | 1   | 13  |
| L09-329_Cl_Gt75(49)_D  | 13              | 1     | 1     | 11       | 3   | 1    | 1   | 1   | 13  |
| L10-091_Cl_Gt69(69)_D  | 12              | 2     | 1     | 13       | 3   | 1    | 1   | 1   | 15  |
| L11-209_Cl_Gt29(27)_D  | 12              | 1     | 1     | 11       | 3   | 1    | 1   | 1   | 13  |
| L12-317_Cl_Gt72(66)_D  | 11              | 2     | 1     | 12       | 3   | 1    | 1   | 1   | 13  |
| L10-023_Cl_Gt75(49)_D  | 11              | 1     | 1     | 11       | 3   | 1    | 1   | 1   | 14  |
| Lpn-Toronto            | 12              | 2     | 0     | 10       | 3   | 1    | 1   | 1   | 14  |
| Lpn-Pontiac            | 13              | 3     | 1     | 11       | 3   | 1    | 1   | 1   | 13  |
| A108_Gt10(93)_Ps       | 12              | 1     | 0     | 6        | 3   | 1    | 1   | 1   | 15  |

|                                                                                                                                                                                                                                                                       |    |   |   |    |   |   |   |   |    |
|-----------------------------------------------------------------------------------------------------------------------------------------------------------------------------------------------------------------------------------------------------------------------|----|---|---|----|---|---|---|---|----|
| A112 Gt10(93) Ps                                                                                                                                                                                                                                                      | 12 | 1 | 0 | 6  | 3 | 1 | 1 | 1 | 16 |
| A114 Gt10(93) Ps                                                                                                                                                                                                                                                      | 12 | 1 | 0 | 6  | 3 | 1 | 1 | 1 | 16 |
| A127 Gt10(93) Ps                                                                                                                                                                                                                                                      | 12 | 1 | 0 | 6  | 3 | 1 | 1 | 1 | 16 |
| A138 Gt9(92) Ps                                                                                                                                                                                                                                                       | 12 | 1 | 0 | 6  | 3 | 1 | 1 | 1 | 16 |
| A166 Gt8(142) Ps                                                                                                                                                                                                                                                      | 13 | 1 | 0 | 7  | 3 | 1 | 1 | 1 | 15 |
| A193 Gt40(47) Ps                                                                                                                                                                                                                                                      | 16 | 1 | 0 | 7  | 3 | 1 | 1 | 1 | 14 |
| A194 Gt40(47) Ps                                                                                                                                                                                                                                                      | 16 | 1 | 0 | 7  | 3 | 1 | 1 | 1 | 15 |
| A195 Gt40(47) Ps                                                                                                                                                                                                                                                      | 16 | 1 | 0 | 7  | 3 | 1 | 1 | 1 | 15 |
| Lpn-Alcoy 2300/99                                                                                                                                                                                                                                                     | 14 | 1 | 0 | 7  | 3 | 1 | 1 | 1 | 15 |
| Lpn-Corby                                                                                                                                                                                                                                                             | 14 | 1 | 0 | 8  | 3 | 1 | 1 | 1 | 15 |
| H1 Gt14(31) D                                                                                                                                                                                                                                                         | 14 | 1 | 0 | 8  | 2 | 1 | 1 | 1 | 16 |
| H2 Gt14(31) D                                                                                                                                                                                                                                                         | 14 | 1 | 0 | 8  | 2 | 1 | 1 | 1 | 16 |
| H3 Gt14(31) D                                                                                                                                                                                                                                                         | 14 | 1 | 0 | 8  | 2 | 1 | 1 | 1 | 16 |
| H23 Gt14(30) D                                                                                                                                                                                                                                                        | 15 | 1 | 0 | 10 | 2 | 1 | 1 | 1 | 16 |
| L02-465 Cl Gt27(133) D                                                                                                                                                                                                                                                | 11 | 1 | 0 | 8  | 5 | 1 | 1 | 1 | 14 |
| L04-041 Cl Gt30(137) D                                                                                                                                                                                                                                                | 11 | 1 | 0 | 6  | 3 | 1 | 1 | 1 | 15 |
| L04-545 Cl Gt40(47) D                                                                                                                                                                                                                                                 | 16 | 1 | 0 | 6  | 3 | 1 | 1 | 1 | 16 |
| L05-341 Cl Gt8(132) D                                                                                                                                                                                                                                                 | 12 | 1 | 0 | 6  | 3 | 1 | 1 | 1 | 15 |
| L06-129 Cl Gt71(135) D                                                                                                                                                                                                                                                | 12 | 1 | 0 | 7  | 3 | 1 | 1 | 1 | 17 |
| L06-153 Cl Gt71(135) D                                                                                                                                                                                                                                                | 12 | 1 | 0 | 7  | 3 | 1 | 1 | 1 | 17 |
| Gt, MLVA genotype; _Ps, West Bank; _D, Germany, ANK, ankyrin; F-box, F-box domain; LLR, leucine rich repeats; P450, cytochrome_P450; P-kinases (protein kinases); U-box, U-box domain; HAD, HAD-superfamily hydrolase; SET, SET domain; and HPS, Heat Shock proteins. |    |   |   |    |   |   |   |   |    |

| Table S10 : Nucleotide identity values of orthologous pore-forming activity genes with respect to the BLASTp search against the VFDB using <i>L. pneumophila</i> strain Philadelphia1 as default reference genome |                                   |             |             |             |                  |                  |                  |                  |             |             |             |              |
|-------------------------------------------------------------------------------------------------------------------------------------------------------------------------------------------------------------------|-----------------------------------|-------------|-------------|-------------|------------------|------------------|------------------|------------------|-------------|-------------|-------------|--------------|
| <i>L. pneumophila</i> strain                                                                                                                                                                                      | <i>Secretion system</i>           |             |             |             |                  |                  |                  |                  |             |             |             | <i>Toxin</i> |
|                                                                                                                                                                                                                   | Dot/Icm type IVB secretion system |             |             |             |                  |                  |                  |                  |             |             |             | <i>RtxA</i>  |
|                                                                                                                                                                                                                   | <i>icmT</i>                       | <i>icmS</i> | <i>icmR</i> | <i>icmQ</i> | <i>icmL/dotI</i> | <i>icmK/dotH</i> | <i>icmE/dotG</i> | <i>icmC/dotE</i> | <i>dotB</i> | <i>dotA</i> | <i>icmW</i> | <i>rtxA</i>  |
|                                                                                                                                                                                                                   | Id*                               |             |             |             |                  |                  |                  |                  |             |             |             |              |
| Lpn-Corby                                                                                                                                                                                                         | 82%                               | 100%        | 95%         | 100%        | 84%              | 84%              | 88%              | 91%              | 100%        | 85%         | 98%         | 85%          |
| Lpn-Alcoy                                                                                                                                                                                                         | 82%                               | 100%        | 95%         | 100%        | 84%              | 84%              | 88%              | 99%              | 100%        | 81%         | 98%         | 85%          |
| L02-465_CI_Gt27(133)_D                                                                                                                                                                                            | 82%                               | 100%        | 95%         | 100%        | 84%              | 84%              | 88%              | 99%              | 100%        | 81%         | 99%         | 85%          |
| L04-545_CI_Gt40(47)_D                                                                                                                                                                                             | 82%                               | 100%        | 95%         | 100%        | 84%              | 84%              | 88%              | 99%              | 100%        | 81%         | 98%         | 84%          |
| A193_Gt40(47)_Ps                                                                                                                                                                                                  | 82%                               | 100%        | 95%         | 100%        | 84%              | 84%              | 88%              | 99%              | 100%        | 78%         | 98%         | 84%          |
| A194_Gt40(47)_Ps                                                                                                                                                                                                  | 82%                               | 100%        | 95%         | 100%        | 84%              | 84%              | 88%              | 99%              | 100%        | 78%         | 98%         | 84%          |
| A195_Gt40(47)_Ps                                                                                                                                                                                                  | 82%                               | 100%        | 95%         | 100%        | 84%              | 84%              | 88%              | 99%              | 100%        | 78%         | 98%         | 84%          |
| A138_Gt9(92)_Ps                                                                                                                                                                                                   | 82%                               | 100%        | 95%         | 100%        | 84%              | 83%              | 88%              | 99%              | 100%        | 78%         | 98%         | 75%          |
| A112_Gt10(93)_Ps                                                                                                                                                                                                  | 82%                               | 100%        | 95%         | 100%        | 84%              | 83%              | 88%              | 99%              | 100%        | 78%         | 98%         | 75%          |
| A114_Gt10(93)_Ps                                                                                                                                                                                                  | 82%                               | 100%        | 95%         | 100%        | 84%              | 83%              | 88%              | 99%              | 100%        | 78%         | 98%         | 75%          |
| A127_Gt10(93)_Ps                                                                                                                                                                                                  | 82%                               | 100%        | 95%         | 100%        | 84%              | 83%              | 88%              | 99%              | 100%        | 78%         | 98%         | 75%          |
| A108_Gt10(93)_Ps                                                                                                                                                                                                  | 82%                               | 100%        | 95%         | 100%        | 84%              | 83%              | 88%              | 99%              | 100%        | 78%         | 98%         | 75%          |
| H3_Gt14(31)_D                                                                                                                                                                                                     | 82%                               | 100%        | 95%         | 100%        | 84%              | 83%              | 87%              | 99%              | 100%        | 79%         | 98%         | 86%          |
| H23_Gt14(30)_D                                                                                                                                                                                                    | 82%                               | 100%        | 95%         | 100%        | 84%              | 83%              | 87%              | 99%              | 100%        | 78%         | 98%         | 86%          |
| H1_Gt14(31)_D                                                                                                                                                                                                     | 82%                               | 100%        | 95%         | 100%        | 84%              | 83%              | 87%              | 99%              | 100%        | 78%         | 98%         | 86%          |
| H2_Gt14(31)_D                                                                                                                                                                                                     | 82%                               | 100%        | 95%         | 100%        | 84%              | 83%              | 87%              | 99%              | 100%        | 78%         | 98%         | 86%          |
| L06-153_CI_Gt71(135)_D                                                                                                                                                                                            | 82%                               | 100%        | 95%         | 100%        | 84%              | 84%              | 88%              | 99%              | 100%        | 80%         | 98%         | 85%          |
| L06-129_CI_Gt71(135)_D                                                                                                                                                                                            | 82%                               | 100%        | 95%         | 100%        | 84%              | 84%              | 88%              | 99%              | 100%        | 80%         | 98%         | 85%          |

|                        |     |      |     |      |     |     |     |      |      |     |      |     |
|------------------------|-----|------|-----|------|-----|-----|-----|------|------|-----|------|-----|
| A166_Gt8(142)_Ps       | 82% | 100% | 95% | 100% | 84% | 84% | 89% | 99%  | 100% | 80% | 98%  | 84% |
| L04-041_CI_Gt30(137)_D | 82% | 100% | 95% | 100% | 84% | 84% | 88% | 99%  | 100% | 80% | 98%  | 85% |
| L05-341_CI_Gt8(132)_D  | 82% | 100% | 95% | 100% | 84% | 84% | 88% | 99%  | 100% | 80% | 98%  | 84% |
| Lpn-Pontiac            | 82% | 100% | 96% | 99%  | 84% | 82% | 88% | 100% | 100% | 88% | 99%  | 80% |
| L10-091_CI_Gt69(69)_D  | 82% | 100% | 96% | 99%  | 84% | 82% | 88% | 100% | 100% | 81% | 99%  | 75% |
| L12-317_CI_Gt72(66)_D  | 82% | 100% | 96% | 99%  | 84% | 82% | 88% | 100% | 100% | 81% | 99%  | 75% |
| L11-209_CI_Gt29(27)_D  | 82% | 100% | 96% | 99%  | 84% | 82% | 88% | 100% | 100% | 81% | 99%  | 80% |
| L10-023_CI_Gt75(49)_D  | 82% | 100% | 96% | 99%  | 84% | 82% | 88% | 100% | 100% | 81% | 99%  | 80% |
| L09-329_CI_Gt75(49)_D  | 82% | 100% | 96% | 99%  | 84% | 82% | 88% | 100% | 100% | 81% | 99%  | 80% |
| L02-521_CI_Gt29(27)_D  | 82% | 100% | 96% | 99%  | 84% | 82% | 88% | 100% | 100% | 81% | 99%  | 80% |
| Lpn-Paris              | 82% | 100% | 96% | 99%  | 84% | 82% | 89% | 100% | 99%  | 81% | 99%  | 83% |
| H39_Gt4(17)_D          | 82% | 100% | 96% | 99%  | 84% | 82% | 89% | 100% | 100% | 81% | 99%  | 83% |
| A139_Gt4(17)_Ps        | 82% | 100% | 96% | 99%  | 84% | 82% | 89% | 100% | 99%  | 81% | 99%  | 83% |
| A5_Gt4(17)_Ps          | 82% | 100% | 96% | 99%  | 84% | 82% | 89% | 100% | 99%  | 81% | 99%  | 83% |
| A29_Gt6(18)_Ps         | 82% | 100% | 96% | 99%  | 84% | 82% | 89% | 100% | 99%  | 81% | 99%  | 83% |
| A131_Gt6(18)_Ps        | 82% | 100% | 96% | 99%  | 84% | 82% | 89% | 100% | 99%  | 81% | 99%  | 83% |
| Lpn-HL06041035         | 82% | 99%  | 97% | 99%  | 84% | 82% | 87% | 99%  | 100% | 81% | 99%  | 85% |
| H34_Gt22(102)_D        | 82% | 99%  | 97% | 99%  | 84% | 82% | 87% | 99%  | 100% | 81% | 99%  | 85% |
| H29_Gt22(100)_D        | 82% | 99%  | 97% | 99%  | 84% | 82% | 87% | 99%  | 100% | 81% | 99%  | 85% |
| H35_Gt22(102)_D        | 82% | 99%  | 97% | 99%  | 84% | 82% | 87% | 99%  | 100% | 81% | 99%  | 85% |
| Lpn-Lorraine           | 82% | 100% | 97% | 100% | 84% | 82% | 87% | 100% | 100% | 81% | 99%  | 85% |
| A15_Gt12(84)_Ps        | 82% | 100% | 97% | 100% | 84% | 82% | 87% | 100% | 100% | 81% | 99%  | 77% |
| Lpn-Thunderbay         | 82% | 100% | 91% | 100% | 84% | 79% | 91% | 100% | 100% | 93% | 100% | 85% |



|                               |     |      |     |      |     |     |     |      |      |     |      |     |
|-------------------------------|-----|------|-----|------|-----|-----|-----|------|------|-----|------|-----|
| <b>L09-313 Cl Gt84(116) D</b> | 82% | 100% | 91% | 100% | 84% | 79% | 91% | 100% | 100% | 93% | 100% | 85% |
| <b>L01-443 Cl Gt64(74) D</b>  | 82% | 100% | 91% | 100% | 84% | 79% | 91% | 100% | 100% | 93% | 100% | 85% |
| <b>A156_Gt64(74)_Ps</b>       | 82% | 100% | 91% | 100% | 84% | 79% | 91% | 100% | 100% | 93% | 100% | 85% |
| <b>A129_Gt64(74)_Ps</b>       | 82% | 100% | 91% | 100% | 84% | 79% | 91% | 100% | 100% | 93% | 100% | 85% |
| * Gene Identity               |     |      |     |      |     |     |     |      |      |     |      |     |

**Table S11: Summary of main plasmid features in *L. pneumophila* isolates H3, A129, A29, and L10\_091.**

| Isolate designation   | No. of base pairs (bp) | No. of CDS* | %GC   |
|-----------------------|------------------------|-------------|-------|
| H3_Gt14(31)_D         | 103,432                | 111         | 40.0% |
| A129_Gt64(74)_Ps      | 72,682                 | 78          | 38.9% |
| A29_Gt6(18)_Ps        | 25,160                 | 27          | 38.6% |
| L10-091_Cl_Gt69(69)_D | 23,296                 | 25          | 38.6% |

\*CDS: Coding DNA Sequence

| <b>Table S12: Identification and distribution of prophages in the 55 <i>L. pneumophila</i> strains studied.</b> |                        |               |                      |              |                                  |                        |                 |                           |                               |                                  |                                           |                               |                        |             |
|-----------------------------------------------------------------------------------------------------------------|------------------------|---------------|----------------------|--------------|----------------------------------|------------------------|-----------------|---------------------------|-------------------------------|----------------------------------|-------------------------------------------|-------------------------------|------------------------|-------------|
| <b>Strain designation</b>                                                                                       | <b>Replicon/Contig</b> | <b>Region</b> | <b>Region Length</b> | <b>Score</b> | <b>Specific Keyword</b>          | <b>Region Position</b> | <b>No. tRNA</b> | <b>No. Total Proteins</b> | <b>No. Phage Hit proteins</b> | <b>No. Hypothetical Proteins</b> | <b>% Phages and Hypothetical Proteins</b> | <b>No. Bacterial Proteins</b> | <b>Attachment Site</b> | <b>% GC</b> |
| Lpn-LPE509                                                                                                      | contig000001           | 1             | 26Kb                 | 50           | Plate, integrase and transposase | 2,248,193 - 2,274,256  | 0               | 16                        | 9                             | 5                                | 87.5                                      | 2                             | Yes                    | 38.2        |
| Lpn-Philadelphia1                                                                                               | contig000001           | 1             | 70.3Kb               | 70           | Plate, integrase and transposase | 1,158,151 - 1,188,905  | 0               | 26                        | 13                            | 10                               | 88.4                                      | 3                             | Yes                    | 37.2        |
| Lpn-Thunderbay                                                                                                  | contig000001           | 1             | 70.3Kb               | 70           | Plate, integrase and transposase | 1,165,464 - 1,196,215  | 0               | 26                        | 13                            | 10                               | 88.4                                      | 4                             | Yes                    | 37.2        |
| Lpn-ATCC43290                                                                                                   | contig000001           | 1             | 25.1Kb               | 60           | Plate, integrase and transposase | 1,118,202 - 1,143,394  | 0               | 29                        | 15                            | 11                               | 89.6                                      | 3                             | yes                    | 36.5        |
|                                                                                                                 | contig000001           | 2             | 11.7Kb               | 70           | head, integrase and transposase  | 2,316,998 - 2,328,793  | 0               | 11                        | 7                             | 3                                | 90.9                                      | 1                             | Yes                    | 37.2        |

|                |              |   |        |    |                                 |                       |   |    |    |   |      |   |     |      |
|----------------|--------------|---|--------|----|---------------------------------|-----------------------|---|----|----|---|------|---|-----|------|
| Lpn-lpm7613    | contig000001 | 1 | 11.7Kb | 70 | head, integrase and transposase | 2,316,998 - 2,328,794 | 0 | 11 | 7  | 3 | 90.9 | 1 | Yes | 37.2 |
| Lpn-Lens       | contig000001 | 1 | 13.1Kb | 30 | integrase and plate             | 1,180,694 - 1,193,879 | 0 | 10 | 6  | 3 | 90   | 1 | Yes | 38.3 |
| Lpn-Lorraine   | contig000001 | 1 | 7.6Kb  | 10 | NA                              | 858,707 - 866,331     | 0 | 7  | 6  | 0 | 85.7 | 1 | No  | 36.1 |
|                | contig000001 | 2 | 16.3Kb | 20 | integrase                       | 1,107,057 - 1,123,388 | 0 | 7  | 4  | 0 | 57.1 | 3 | Yes | 37.5 |
|                | contig000001 | 3 | 22.7Kb | 30 | integrase and protease          | 2,553,434 - 2,576,203 | 1 | 9  | 7  | 1 | 88.8 | 1 | Yes | 40   |
|                | contig000001 | 4 | 31.9Kb | 30 | integrase                       | 2,939,178 - 2,971,159 | 0 | 9  | 5  | 3 | 88.8 | 1 | Yes | 40.4 |
| Lpn-HL06041035 | contig000001 | 1 | 31.5Kb | 50 | Plate, and integrase            | 1,210,553 - 1,242,139 | 0 | 19 | 11 | 6 | 89.4 | 2 | Yes | 37.5 |
|                | contig000001 | 2 | 31.5Kb | 70 | Plate, and transposase          | 1,225,361 - 1,256,8   | 0 | 9  | 7  | 1 | 88.8 | 1 | Yes | 36.5 |

|             |              |   |            |    |                                               |                                     |   |    |   |   |      |   |     |          |
|-------------|--------------|---|------------|----|-----------------------------------------------|-------------------------------------|---|----|---|---|------|---|-----|----------|
|             |              |   |            |    |                                               | 64                                  |   |    |   |   |      |   |     |          |
| Lpn-D7631   | contig000001 | 1 | 27.9K<br>b | 40 | Plate,<br>integrase<br>and<br>transposa<br>se | 1,192,6<br>48<br>-<br>1,220,5<br>87 | 0 | 16 | 9 | 7 | 93.7 | 1 | Yes | 38.<br>6 |
| Lpn-D7630   | contig000001 | 1 | 27.9K<br>b | 40 | Plate,<br>integrase<br>and<br>transposa<br>se | 1,192,6<br>48<br>-<br>1,220,5<br>88 | 0 | 16 | 9 | 7 | 93.7 | 1 | Yes | 38.<br>6 |
| Lpn-D7632   | contig000001 | 1 | 27.9K<br>b | 40 | Plate,<br>integrase<br>and<br>transposa<br>se | 1,192,6<br>48<br>-<br>1,220,5<br>89 | 0 | 16 | 9 | 7 | 93.7 | 1 | Yes | 38.<br>6 |
| Lpn-Paris   | contig000001 | 1 | 18.7K<br>b | 30 | Plate and<br>integrase                        | 1,185,5<br>27<br>-<br>1,204,2<br>95 | 0 | 15 | 9 | 5 | 93.3 | 1 | Yes | 38.<br>5 |
| Lpn-OLDA    | contig000001 | 1 | 18.7K<br>b | 30 | Plate and<br>integrase                        | 1,176,9<br>98<br>-<br>1,195,7<br>66 | 0 | 15 | 9 | 5 | 93.3 | 1 | Yes | 38.<br>5 |
| Lpn-Pontiac | contig000001 | 1 | 23.8K<br>b | 30 | Plate and<br>integrase                        | 1,214,0<br>34<br>-<br>1,237,8<br>58 | 0 | 13 | 8 | 4 | 92.3 | 1 | Yes | 37.<br>8 |
| Lpn-Toronto | contig000001 | 1 | 16.2K<br>b | 60 | Plate,<br>integrase<br>and<br>transposa       | 1,189,6<br>58<br>-<br>1,214,9       | 0 | 10 | 6 | 2 | 80   | 2 | Yes | 35.<br>5 |

|                      |              |    |        |    |                                              |                             |    |    |    |    |      |    |     |      |
|----------------------|--------------|----|--------|----|----------------------------------------------|-----------------------------|----|----|----|----|------|----|-----|------|
|                      |              |    |        |    | se                                           | 29                          |    |    |    |    |      |    |     |      |
| Lpn-Alcoy<br>2300/99 | contig000001 | 1  | 19.7Kb | 30 | Plate and<br>integrase                       | 1,280,061<br>-<br>1,299,823 | 0  | 12 | 7  | 4  | 91.6 | 1  | Yes | 37   |
| Lpn-Corby            | contig000001 | 1  | 19Kb   | 30 | Plate and<br>integrase                       | 1,286,720<br>-<br>1,287,753 | 0  | 12 | 7  | 4  | 91.6 | 1  | Yes | 38.2 |
| A156_Gt64(74)_<br>Ps | contig000001 | 1  | 20.8Kb | 40 | Protease,<br>integrase<br>and<br>transposase | 222,459<br>-<br>243,352     | 1  | 17 | 9  | 4  | 76.4 | 4  | Yes | 37.4 |
|                      | contig000002 | 2  | 14Kb   | 30 | integrase<br>and<br>transposase              | 436,455<br>-<br>461,457     | 0  | 13 | 8  | 3  | 84.6 | 2  | Yes | 35.6 |
| A129_Gt64(74)_<br>Ps | contig000003 | 1  | 14Kb   | 30 | integrase<br>and Plate                       | 728<br>-<br>14,800          | 0  | 12 | 7  | 4  | 91.6 | 1  | Yes | 38.4 |
| A15_Gt12(84)_P<br>s  |              | NA | NA     | NA | NA                                           | NA                          | NA | NA | NA | NA | NA   | NA | NA  | NA   |
| A139_Gt4(17)_P<br>s  |              | NA | NA     | NA | NA                                           | NA                          | NA | NA | NA | NA | NA   | NA | NA  | NA   |
| A5_Gt4(17)_Ps        | contig000001 | 1  | 7.6Kb  | 10 | NA                                           | 9,003<br>-<br>16,627        | 0  | 7  | 6  | 0  | 85.7 | 1  | No  | 36   |
| A29_Gt6(18)_Ps       | contig000008 | 1  | 19.5Kb | 30 | integrase<br>and Plate                       | 263,913<br>-<br>283,445     | 0  | 13 | 8  | 4  | 92.3 | 1  | Yes | 37.2 |

|                  |              |    |        |    |                     |                       |    |    |    |    |      |    |     |      |
|------------------|--------------|----|--------|----|---------------------|-----------------------|----|----|----|----|------|----|-----|------|
| A131_Gt6(18)_Ps  | contig000003 | 1  | 19.5Kb | 30 | integrase and Plate | 263,913 - 283,445     | 0  | 13 | 8  | 4  | 92.3 | 1  | Yes | 36.3 |
|                  | contig000004 | 2  | 35.9Kb | 30 | recombinase         | 79,639 - 115,554      | 0  | 9  | 6  | 1  | 77.7 | 2  | Yes | 37.2 |
| A193_Gt40(47)_Ps | NA           | NA | NA     | NA | NA                  | NA                    | NA | NA | NA | NA | NA   | NA | NA  | NA   |
| A194_Gt40(47)_Ps | contig000001 | 1  | 13.1Kb | 30 | integrase and Plate | 1,144,101 - 1,157,286 | 0  | 10 | 6  | 3  | 90   | 1  | Yes | 38.3 |
| A195_Gt40(47)_Ps | contig000002 | 1  | 9.7Kb  | 20 | protease            | 65,660 - 75,400       | 1  | 7  | 6  | 1  | 100  | 0  | no  | 39.6 |
| A138_Gt9(92)_Ps  | contig000007 | 1  | 20.3K  | 40 | integrase and Plate | 25,862 - 46,223       | 0  | 12 | 7  | 4  | 91.6 | 1  | Yes | 38.4 |
| A112_Gt10(93)_Ps | NA           | NA | NA     | NA | NA                  | NA                    | NA | NA | NA | NA | NA   | NA | NA  | NA   |
| A114_Gt10(93)_Ps | NA           | NA | NA     | NA | NA                  | NA                    | NA | NA | NA | NA | NA   | NA | NA  | NA   |
| A127_Gt10(93)_Ps | NA           | NA | NA     | NA | NA                  | NA                    | NA | NA | NA | NA | NA   | NA | NA  | NA   |
| A108_Gt10(93)_Ps | NA           | NA | NA     | NA | NA                  | NA                    | NA | NA | NA | NA | NA   | NA | NA  | NA   |
| A166_Gt8(142)_Ps | NA           | NA | NA     | NA | NA                  | NA                    | NA | NA | NA | NA | NA   | NA | NA  | NA   |
| H34_Gt22(102)_D  | contig000002 | 1  | 7.7Kb  | 20 | Plate               | 236,746 - 244,461     | 0  | 11 | 6  | 4  | 90.9 | 1  | No  | 37.4 |
| H29_Gt22(100)_D  | contig000004 | 1  | 8.9Kb  | 30 | Plate and integrase | 307 - 9,269           | 0  | 12 | 7  | 4  | 91.6 | 1  | No  | 37.7 |

|                        |              |    |        |    |                           |                       |    |    |    |    |      |    |     |      |
|------------------------|--------------|----|--------|----|---------------------------|-----------------------|----|----|----|----|------|----|-----|------|
| H35_Gt22(102)_D        | contig000007 | 1  | 8.9Kb  | 30 | Plate and integrase       | 307 - 9,269           | 0  | 12 | 7  | 4  | 91.6 | 1  | No  | 37.7 |
| H39_Gt4(17)_D          | contig000002 | 1  | 21Kb   | 30 | Protease and integrase    | 53,825 - 74,871       | 1  | 9  | 7  | 1  | 88.8 | 1  | Yes | 39.9 |
| H3_Gt14(31)_D          | contig000001 | 1  | 19.1Kb | 40 | Plate and integrase       | 1,235,020 - 1,254,153 | 0  | 20 | 9  | 8  | 85   | 3  | Yes | 36.3 |
| H23_Gt14(30)_D         | NA           | NA | NA     | NA | NA                        | NA                    | NA | NA | NA | NA | NA   | NA | NA  | NA   |
| H1_Gt14(31)_D          | contig000001 | 1  | 13.1Kb | 30 | Plate and integrase       | 140,500 - 153,676     | 0  | 10 | 6  | 3  | 90   | 1  | Yes | 38.2 |
| H2_Gt14(31)_D          | contig000007 | 1  | 19.1Kb | 40 | Plate and integrase       | 432,357 - 451,502     | 0  | 20 | 9  | 8  | 85   | 3  | Yes | 36.3 |
| L09-313_Cl_Gt84(116)_D | contig000005 | 1  | 7.7Kb  | 20 | Plate                     | 297,105 - 304,820     | 0  | 11 | 6  | 4  | 90.9 | 1  | No  | 37.4 |
| L01-443_Cl_Gt64(74)_D  | contig000006 | 1  | 25Kb   | 40 | Transposase and integrase | 161,092 - 186,094     | 0  | 13 | 8  | 3  | 84.6 | 2  | Yes | 35.6 |
|                        | contig000007 | 2  | 7.6Kb  | 10 | NA                        | 259,232 - 266,856     | 0  | 7  | 6  | 0  | 85.7 | 1  | No  | 36.2 |
| L10-091_Cl_Gt69(69)_D  | contig000002 | 1  | 5.6Kb  | 30 | Head                      | 1,954 - 7,588         | 0  | 8  | 6  | 1  | 87.5 | 1  | No  | 36.5 |
| L12-317_Cl_Gt72(66)_D  | contig000005 | 1  | 7.6Kb  | 10 | NA                        | 43,883 - 51,507       | 0  | 7  | 6  | 0  | 85.7 | 1  | no  | 36.1 |



|                                |              |    |        |    |                     |                             |    |    |    |    |      |    |     |      |
|--------------------------------|--------------|----|--------|----|---------------------|-----------------------------|----|----|----|----|------|----|-----|------|
| L11-<br>209_Cl_Gt29(27)<br>_D  | NA           | NA | NA     | NA | NA                  | NA                          | NA | NA | NA | NA | NA   | NA | NA  | NA   |
| L10-<br>023_Cl_Gt75(49)<br>_D  | contig000001 | 1  | 23.8Kb | 30 | Plate and integrase | 1,196,930<br>-<br>1,220,754 | 0  | 13 | 8  | 4  | 92.3 | 1  | yes | 37.8 |
| L09-<br>329_Cl_Gt75(49)<br>_D  | NA           | NA | NA     | NA | NA                  | NA                          | NA | NA | NA | NA | NA   | NA | NA  | NA   |
| L02-<br>521_Cl_Gt29(27)<br>_D  | NA           | NA | NA     | NA | NA                  | NA                          | NA | NA | NA | NA | NA   | NA | NA  | NA   |
| L02-<br>465_Cl_Gt27(133)<br>_D | contig000007 | 1  | 7.6Kb  | 10 | NA                  | 1,196,930<br>-<br>1,220,754 | 0  | 7  | 6  | 0  | 85.7 | 1  | No  | 36.2 |
| L04-<br>545_Cl_Gt40(47)<br>_D  | contig000007 | 1  | 23Kb   | 30 | Plate and integrase | 15,451<br>-<br>38,507       | 0  | 10 | 6  | 3  | 90   | 1  | Yes | 40.3 |
| L06-<br>153_Cl_Gt71(135)<br>_D | contig000001 | 1  | 7.6Kb  | 10 | NA                  | 139,563<br>-<br>147,187     | 0  | 7  | 6  | 0  | 85.7 | 1  | No  | 36   |
| L06-<br>129_Cl_Gt71(135)<br>_D | contig000001 | 1  | 7.6Kb  | 10 | NA                  | 2,031<br>-<br>9,655         | 0  | 7  | 6  | 0  | 85.7 | 1  | No  | 36   |
| L04-<br>041_Cl_Gt30(137)<br>_D | contig000002 | 1  | 19.8Kb | 20 | integrase           | 70,310<br>-<br>90,170       | 0  | 14 | 6  | 5  | 78.5 | 3  | Yes | 36.6 |
|                                | contig000003 | 2  | 7.7Kb  | 20 | Plate               | 25,004<br>-<br>32,719       | 0  | 11 | 6  | 4  | 90.9 | 1  | No  | 37.4 |

|                              |    |    |    |    |    |    |    |    |    |    |    |    |    |    |        |
|------------------------------|----|----|----|----|----|----|----|----|----|----|----|----|----|----|--------|
| L05-<br>341_Cl_Gt8(132)<br>D | NA | N<br>A |
|------------------------------|----|----|----|----|----|----|----|----|----|----|----|----|----|----|--------|

NA: Not  
Available

**Comparative genomics of *Legionella pneumophila* isolates from the West Bank and Germany support molecular epidemiology of Legionnaires' disease**

***Zayed et al.***

**SUPPLEMENTARY MATERIALS**

**FIGURES**

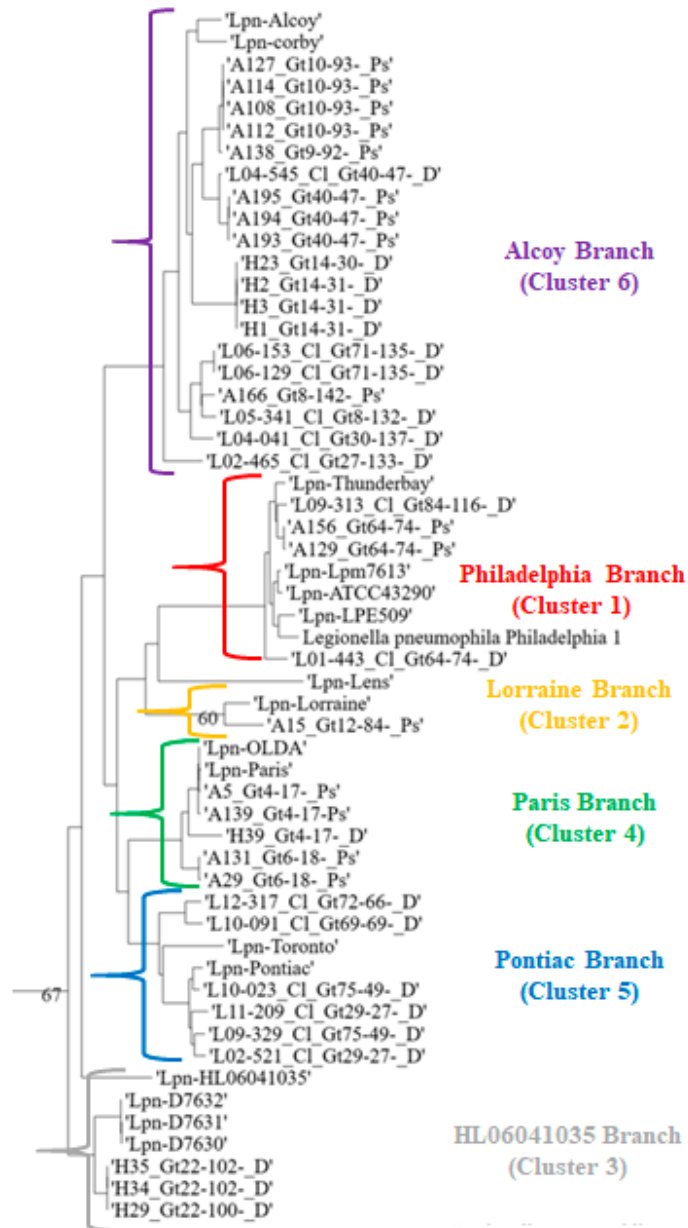

**Figure S1.** Phylogenomic tree of 55 *L. pneumophila* genomes based on the GBDP phylogenetic analyses retrieved from the TYGS website. The branch lengths are scaled in terms of GBDP distance formula d4. Color coding specific for each *L. pneumophila* branch

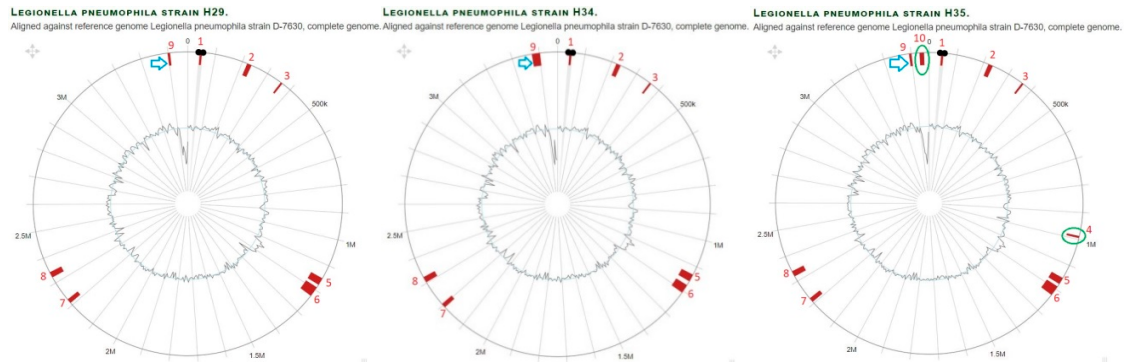

**Figure S2: Comparison of Genomic islands in branch HL06041035 of *L. pneumophila* strain H29, H34 and H35 aligned against reference genome *L. pneumophila* strain HL06041035.** The outer layers, the circle shows: (i) nucleotide positions in megabase pairs (Mbp) (black); (ii) Island Viewer-annotated potential genomic islands (GI) are labeled accordingly (red); (iii) Extra GIs (marked Green oval); (iv) GI different size (Blue arrow).

**LEGIONELLA PNEUMOPHILA STRAIN A139.**  
Aligned against reference genome Legionella pneumophila str. Paris complete genome.

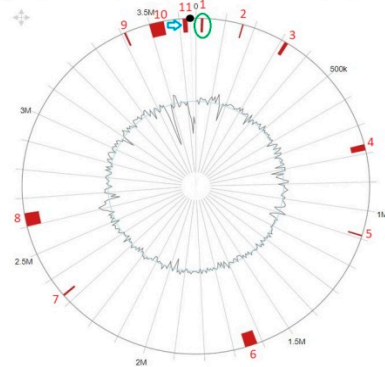

**LEGIONELLA PNEUMOPHILA STRAIN A5.**  
Aligned against reference genome Legionella pneumophila str. Paris complete genome.

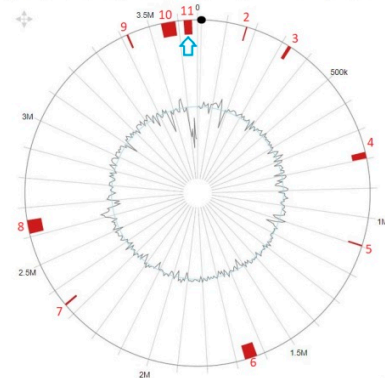

**Figure S3: Comparison of Genomic islands in branch Paris of *L. pneumophila* strain A5 and A139 aligned against reference genome *L. pneumophila* strain Paris.** The outer layers, the circle shows: (i) nucleotide positions in megabase pairs (Mbp) (black); (ii) Island Viewer-annotated potential genomic islands (GI) are labeled accordingly (red); (iii) Extra GIs (marked Green oval); (iv) GI different size (Blue arrow).

**LEGIONELLA PNEUMOPHILA STRAIN A131.**  
Aligned against reference genome Legionella pneumophila str. Paris complete genome.

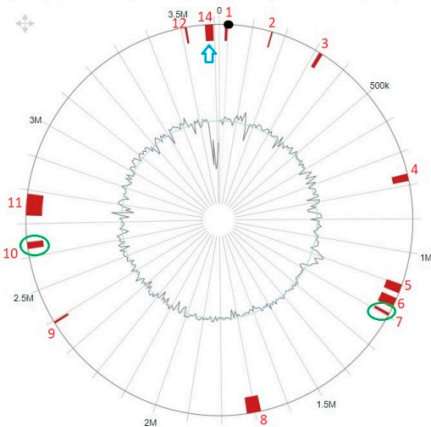

**LEGIONELLA PNEUMOPHILA STRAIN A29.**  
Aligned against reference genome Legionella pneumophila str. Paris complete genome.

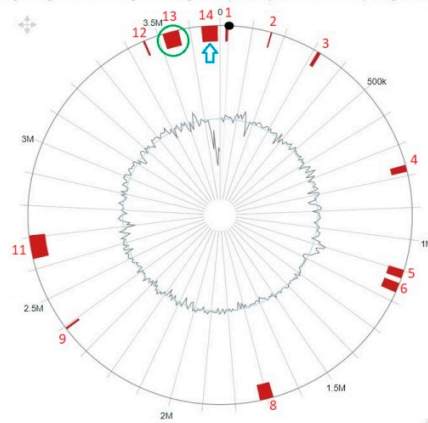

**Figure S4: Comparison of Genomic islands in Branch Paris of *L. pneumophila* strain A29 and A131 aligned against reference genome *L. pneumophila* strain Paris.** The outer layers, the circle shows: (i) nucleotide positions in megabase pairs (Mbp) (black); (ii) Island Viewer-annotated potential genomic islands (GI) are labeled accordingly (red); (iii) Extra GIs (marked Green oval); (iv) GI different size (Blue arrow).
